# 1 Population receptive field estimates for motion-defined 2 stimuli

3 Anna E. Hughes<sup>1,2\*</sup>, John A. Greenwood<sup>1</sup>, Nonie J. Finlayson<sup>1,3</sup> and D. Samuel Schwarzkopf<sup>1,4</sup>

4 <sup>1</sup> Experimental Psychology, University College London, 26 Bedford Way, London, UK, WC1H 0AP

5 \* Correspondence: [a.hughes2@exeter.ac.uk](mailto:a.hughes2@exeter.ac.uk); Tel.: +447752549141

## 6 **Abstract:**

7 The processing of motion changes throughout the visual hierarchy, from spatially restricted ‘local  
8 motion’ in early visual cortex to more complex large-field ‘global motion’ at later stages. Here we  
9 used functional magnetic resonance imaging (fMRI) to examine spatially selective responses in  
10 these areas related to the processing of random-dot stimuli defined by differences in motion. We  
11 used population receptive field (pRF) analyses to map retinotopic cortex using bar stimuli  
12 comprising coherently moving dots. In the first experiment, we used three separate background  
13 conditions: no background dots (dot-defined bar-only), dots moving coherently in the opposite  
14 direction to the bar (kinetic boundary) and dots moving incoherently in random directions (global  
15 motion). Clear retinotopic maps were obtained for the bar-only and kinetic-boundary conditions  
16 across visual areas V1-V3 and in higher dorsal areas. For the global-motion condition, retinotopic  
17 maps were much weaker in early areas and became clear only in higher areas, consistent with the  
18 emergence of global-motion processing throughout the visual hierarchy. However, in a second  
19 experiment we demonstrate that this pattern is not specific to motion-defined stimuli, with very  
20 similar results for a transparent-motion stimulus and a bar defined by a static low-level property  
21 (dot size) that should have driven responses particularly in V1. We further exclude explanations  
22 based on stimulus visibility by demonstrating that the observed differences in pRF properties do  
23 not follow the ability of observers to localise or attend to these bar elements. Rather, our findings  
24 indicate that dorsal extrastriate retinotopic maps may primarily be determined by the visibility of  
25 the neural responses to the bar relative to the background response (i.e. neural signal-to-noise  
26 ratios) and suggests that claims about stimulus selectivity from pRF experiments must be  
27 interpreted with caution.

28 **Keywords:** vision, motion, population receptive field analysis.

29

## 30 **Present addresses:**

31 <sup>2</sup> Centre for Life and Environmental Sciences, University of Exeter, Penryn Campus, Penryn, UK, TR10 9FE

32 <sup>3</sup> School of Psychology, The University of Queensland, St Lucia QLD 4072, Australia

33 <sup>4</sup> School of Optometry and Vision Science, University of Auckland, 85 Park Road, Auckland, New Zealand

34

35

## 36 1. Introduction

37 Motion perception is one of the fundamental dimensions of vision (**Nakayama, 1985; Nishida, 2011**),  
38 and it is now known that many areas of the brain are involved in motion processing (**Dupont et al.,**  
39 **1994; Pitzalis et al., 2010; Sunaert et al., 1999; Tootell et al., 1997**). Converging psychophysical,  
40 electrophysiological, and imaging evidence suggests that motion is processed in an hierarchical  
41 manner, with signals first being processed locally (within restricted spatial windows) in areas such as  
42 V1 and then combined at higher levels in the visual cortical hierarchy to generate global motion  
43 percepts over larger regions of the visual field (**Adelson and Movshon, 1982; Braddick et al., 2001;**  
44 **Van Essen and Gallant, 1994; Williams and Sekuler, 1984**).

45 Many psychophysical studies have used tasks involving the detection or discrimination of coherent  
46 motion to study the distinction between local- and global-motion processing (**Britten et al., 1993,**  
47 **1992; Newsome and Paré, 1988; Scase et al., 1996; Watamaniuk, 1993**). Due to the aperture  
48 problem, direction-selective neurons in lower visual areas such as V1 are thought to process only  
49 local motion – the 1D motion orthogonal to the orientation of the edge that is passing through the  
50 receptive field (**Adelson and Movshon, 1982; Marr and Ullman, 1981; Movshon, 1986; Wallach,**  
51 **1935**). To be able to process global motion, these 1D signals must be integrated over a relatively  
52 wide visual field area/region, a process thought to occur in higher visual areas, such as V5/MT+ to  
53 generate a global motion direction (**Heeger et al., 1996; Simoncelli and Heeger, 1998**). fMRI  
54 evidence has provided support for a distinction in the neural locations of local and global processing,  
55 showing that V1 was activated more by incoherent local noise than coherent global motion, perhaps  
56 because the noise stimulus led to the activation of neurons with a wider range of motion  
57 selectivities. The reverse pattern was seen in V5 and V3A, which both responded more to coherent  
58 motion compared to the noise stimulus (**Braddick et al., 2001**).

59 Other brain regions may be specialized for the detection of more complex motion patterns. One  
60 example is that of kinetic boundaries, where an edge is defined by differences in coherent motion  
61 direction on either side of the edge. A specific brain region known as the Kinetic Occipital area (KO),  
62 which is thought to include areas such as V3, V3A and V3B (**Larsson and Heeger, 2006**), may be  
63 specialized for detecting these boundaries (**Van Oostende et al., 1997**). However, other research  
64 suggests that KO may not be completely specialized for motion-boundary processing, with KO  
65 thought to also respond preferentially to stimuli such as form cues (**Zeki et al., 2003**). It has further  
66 been shown that other visual areas such as LO1, LO2 and V7 respond preferentially to motion  
67 boundaries, suggesting that motion-boundary processing may be more widely distributed across the  
68 visual cortex (**Larsson et al., 2010**).

69 Despite this debate over the specificity of the area responding to kinetic contours, it is clear that  
70 kinetic boundaries are relatively complex stimuli that are not processed at lower levels in the visual  
71 hierarchy: they produce little fMRI response in lower visual areas such as V1 and V2 (**Van Oostende**  
72 **et al., 1997; Zeki et al., 2003**), consistent with electrophysiological evidence that the majority of  
73 neurons in these areas do not respond to kinetic contours (**Leventhal et al., 1998; Marcar et al.,**  
74 **2000**).

75 The visual hierarchy also has multiple representations of the retina, laid out in topological maps that  
76 are commonly called retinotopic maps (**Felleman and Van Essen, 1991; Sereno et al., 1995**). While it  
77 was once thought that retinotopy was a property of lower level visual areas, it is now known that  
78 areas such as MT+ and MST also contain retinotopic maps (known as TO1 and TO2 respectively;  
79 **Amano et al., 2009**), as do the frontal eye fields (**Kastner et al., 2007**) and even the default mode  
80 network (**Knapen et al., 2018**). Indeed, despite the large receptive field sizes within primate MT/V5,  
81 it is possible to track object position at the population level (**Chen et al., 2015**). This suggests that  
82 retinotopy is a general organizing principle within the cortex. It is therefore of interest to know  
83 whether retinotopic map properties vary according to the visual area under question, and  
84 particularly whether these properties are affected by the different functional selectivities of  
85 different regions of the brain.

86 One technique that has been used to analyse retinotopic maps via fMRI is population receptive field  
87 (pRF) analysis, providing an estimation of both the visual field position preferred by each voxel and  
88 the range of visual field locations where a stimulus evokes a response (**Dumoulin and Wandell,**  
89 **2008**). pRFs can therefore be thought of as a statistical summary of the neuronal properties within a  
90 sampled region. Recent work has shown systematic differences in pRF sizes across different brain  
91 regions and eccentricities, with size increasing along the visual processing hierarchy and with  
92 increasing eccentricity (**Alvarez et al., 2015; Amano et al., 2009; Dumoulin and Wandell, 2008; Haas**  
93 **et al., 2014; Harvey and Dumoulin, 2011; Schwarzkopf et al., 2014**).

94 Across these different brain areas, several factors can affect pRF size and position. Retinotopy in  
95 early visual areas is primarily thought to be stimulus-driven, but there is evidence that higher level  
96 maps can also be attentionally-driven (**Tootell et al., 1998**). One study (**Saygin and Sereno, 2008**)  
97 used point light biological walkers moving in a 'wedge' stimulus to dissociate attention and stimulus  
98 effects in retinotopic mapping, and showed that V1 did not respond clearly when the distinction  
99 between stimulus and background was driven only attentionally, but it did respond when there was  
100 a visual difference between stimulus and background without attention directed to the stimulus. The  
101 opposite pattern was seen in frontal and parietal areas. The spatial tuning of pRFs is also affected by

102 attentional load at fixation, with pRF size increasing and pRF location becoming more eccentric  
103 under high perceptual load (**Haas et al., 2014**). Similar results have also been reported in face-  
104 selective brain regions (**Kay et al., 2015**). This position modulation seems to occur across the entire  
105 visual field, not just at the attended location (**Klein et al., 2014**), and recent work suggests that these  
106 position shifts are the key mechanism by which attention enhances discriminability and  
107 representational quality of stimuli (**Vo et al., 2017**). It therefore seems that attention can affect  
108 cortical spatial tuning properties, in turn altering the visibility of stimulus differences.

109 Stimulus properties may also alter the measured properties of pRFs. In particular, the fMRI response  
110 of a voxel may be driven by different groups of cells depending upon the properties of the stimulus.  
111 While most studies have used simple luminance-defined stimuli (such as checkerboards) to generate  
112 pRF maps, more complex stimuli may be especially suited for generating maps in higher visual areas  
113 (**Yildirim et al., 2018**). A recent study that used a pRF mapping stimulus designed specifically to  
114 isolate orientation contrast showed reductions in measured pRF size in higher visual areas such as  
115 LO compared to the measurements made with standard luminance-based stimuli (**Yildirim et al.,**  
116 **2018**). pRF sizes have also been shown to vary based on the alignment and curvature of contours  
117 within mapping stimuli (**Dumoulin et al., 2014**). In the motion domain, there is evidence that MT+  
118 may be more susceptible to stimulus configuration than earlier visual areas (**Alvarez et al., 2015**) but  
119 to date there has been no systematic investigation of the effects of different motion stimuli on pRF  
120 measurement.

121 Given the above variations due to stimulus properties and attentional state, in this study we asked  
122 whether stimuli thought to preferentially drive distinct stages of the motion-processing hierarchy  
123 can similarly alter the estimation of pRF parameters. In our initial experiment, we tested this with a  
124 moving bar stimulus similar to those commonly used in pRF mapping studies, defined by dots  
125 moving coherently. We then used different backgrounds in an attempt to differentially drive  
126 responses in different brain regions. In the bar-only condition, the bar was presented alone against a  
127 grey background. We predicted that this stimulus would generate a strong visual signal and enable  
128 the generation of pRF maps at all levels of the motion-processing hierarchy, much like a typical pRF  
129 mapping stimulus. In the 'kinetic' condition the bar was defined by kinetic boundaries. We predicted  
130 that if these stimuli are preferentially processed in KO/V3B, we might expect smaller pRF sizes and a  
131 higher proportion of voxels responding in this area. Finally, in the 'global' condition, the background  
132 consisted of incoherently moving dots. We therefore predicted that for the 'global' condition, higher  
133 visual areas that process stimuli in a more global manner should be able to distinguish between the  
134 bar and background and thus generate good pRF maps. In contrast, for these latter two conditions,

135 we predicted that V1 would not be able to distinguish the bar from the background, leading to a  
136 reduced response.

137 In a second experiment, we asked whether any differential responses seen in the first experiment  
138 were a consequence of differences in the selectivity of these motion-selective regions, or whether  
139 they could be explained by other factors, such as the visibility of the stimulus. We compared a bar-  
140 only stimulus to two conditions with lower visibility bars: one motion-defined stimulus, where the  
141 bar was defined by transparent motion (against a non-transparent background), and a non-motion  
142 defined stimulus, where the bar was instead defined by differences in dot size. If pRF properties  
143 varied due to differential motion processing, we predicted that a different pattern of responses  
144 should arise for these two stimuli: for example, the ‘transparent’ stimulus should show lower  
145 responsivity than the ‘size defined’ stimulus in V1, but higher responsivity in higher visual areas  
146 selective for global motion. In a similar vein, the subtle dot size difference in the size-defined  
147 stimulus should maximize the signal in V1 and the early visual cortex compared to higher regions.  
148 However, if the differential responses were simply due to the visibility of the bar stimulus, we  
149 predicted similar responses for the two conditions across different visual areas. We also conducted a  
150 third behavioural experiment as a control, presenting each of the above mapping stimuli and  
151 requiring observers to localise the bar element. This allowed us to further assess whether variations  
152 in the properties of pRFs could be predicted by the visibility of the bar stimuli, or whether these  
153 variations can be attributed to the visibility of the neural signals underlying the BOLD response.

## 154 **2. Experiment 1**

155 Here we examined retinotopic maps and pRF properties across the visual hierarchy using three  
156 distinct retinotopic mapping stimuli: the ‘bar-only’ stimulus, similar to standard retinotopic mapping  
157 stimuli; the ‘global’ bar stimulus with coherent motion against a background of noise; and the  
158 ‘kinetic’ bar stimulus with coherent motion against a background of oppositely-moving dots.

### 159 **2.1. Materials and Methods**

#### 160 *2.1.1. Participants*

161 Five participants (one male) took part in Experiment 1, including two of the authors (AH and JG) and  
162 three experienced participants *naïve* to the aims of the study. Participants were aged between 24-36  
163 years (mean = 29.6 years) and one participant was left handed. All participants were experienced in  
164 an fMRI context and had normal or corrected-to-normal visual acuity. Written consent was acquired  
165 from all participants to ensure that they understood the potential risks associated with fMRI. The  
166 experiments were approved by the UCL Research Ethics Committee.

167

168 *2.1.2. Stimuli*

169 Figure 1 shows a schematic of the experimental set up, and GIF versions of the different  
170 experimental stimuli are available as supplementary material.

171

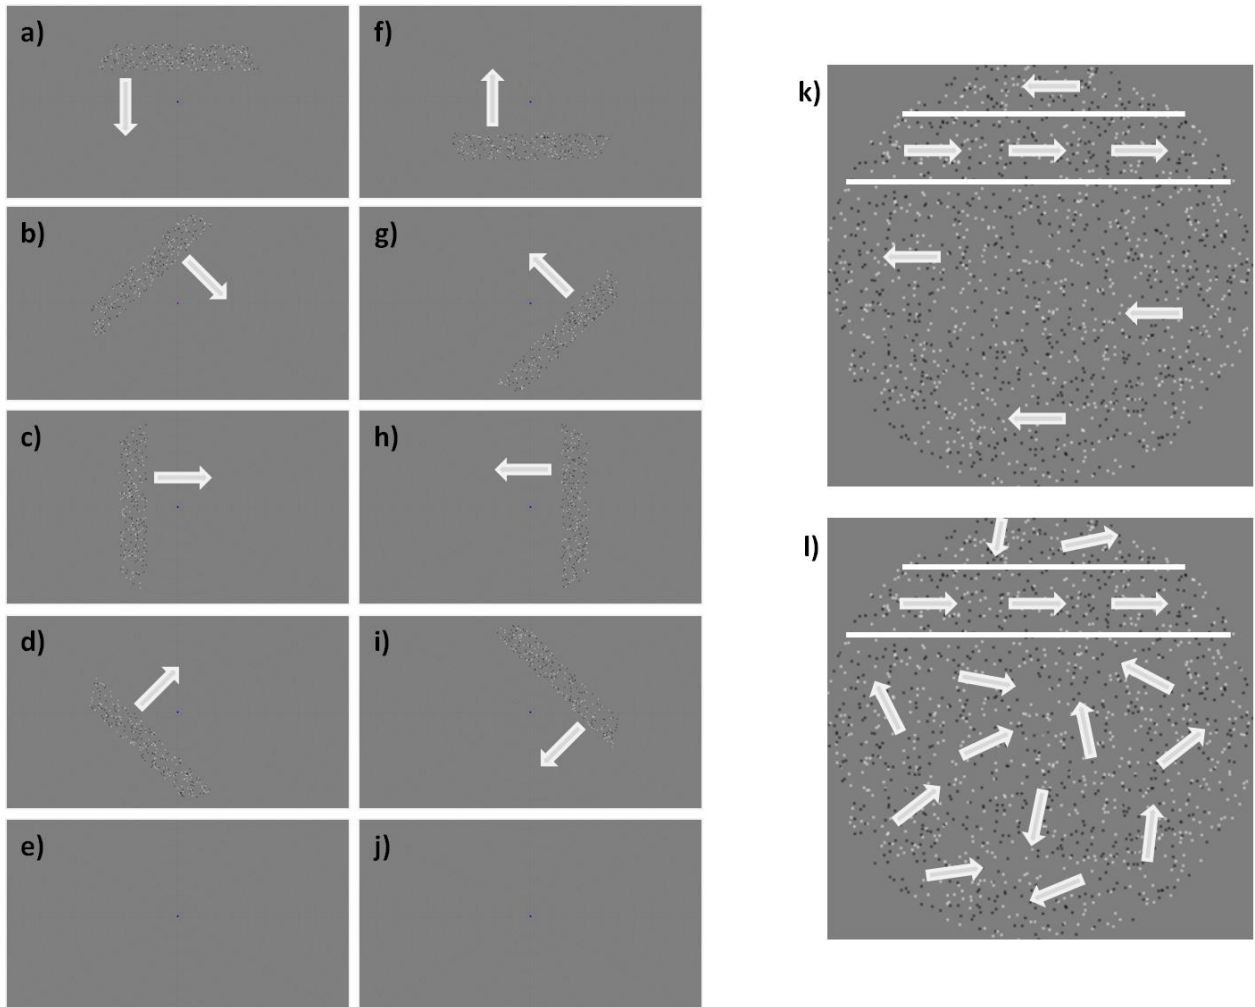

172

173 **Figure 1.** Schematic diagrams of the experimental set up in Experiment 1. (a) to (j) show one experimental run  
174 for the 'bar-only' condition, in the trial order presentation used for all stimuli in Experiment 1. Arrows indicate  
175 the direction of movement of the bar. Note in (b) that the fixation dot has changed colour, as part of the  
176 attentional task used in the experiment. (k) shows a schematic of the 'kinetic' condition. Within the bar (the  
177 area within the white lines) the dots moved in one direction (orthogonal to the bar movement); outside this  
178 area, they moved in the opposite direction. (l) shows a schematic of the 'global' condition; the movement  
179 inside the bar is in one direction, but outside the bar, the dots move in random directions.

180

181 Stimuli were created using MATLAB (MathWorks, Natick, MA) and the Psychophysics toolbox  
182 (Brainard, 1997; Pelli, 1997). Stimuli were projected onto a screen (resolution 1920 x 1080 pixels,  
183 size 36.8 x 20.2cm) at the rear of the scanner bore, with the screen image reflected off a mirror  
184 attached above the head coil. The viewing distance was 67cm, meaning the screen subtended 30.7 x  
185 17.1 degrees of visual angle on the retina. The refresh rate was 60Hz.

186

187 The experimental stimulus consisted of a field of 2000 dots (diameter =  $0.09^\circ$ ) against a uniform  
188 median grey field. Half of the dots were randomly selected to be white, and the other half were  
189 black. The initial positions of the dots were randomly determined within a rectangular aperture  $16 \times$   
190  $16^\circ$  in size. A mask was then applied to the image, such that only the dots within a circle with  $8^\circ$   
191 radius from the centre of the screen could be seen. A smaller circular mask (diameter =  $0.8^\circ$ ) was  
192 also applied at the fixation point (diameter =  $0.17^\circ$ ) to hide dots in this area and thus aid participants  
193 in maintaining their fixation. Further masks were also applied depending upon condition (see  
194 below). To further aid fixation, a low contrast “radar screen” pattern was shown behind stimuli (12  
195 radial lines spaced 30 polar degrees apart, extending from just outside the fixation dot to the edge of  
196 the screen, ( $15.5^\circ$ ), along with 11 concentric rings centred on fixation increasing in radius in equal  
197 steps of  $3^\circ$ ).

198

199 A ‘bar’ was defined as a strip within the circular stimulus region that was  $2.4^\circ$  wide and up to  $16^\circ$  in  
200 length (the total width of the hidden stimulus rectangle). This area was shifted over the course of  
201 each trial in 25 discrete steps of  $0.7^\circ$  and 1 second each, beginning at one edge of the stimulus  
202 aperture and ending on the opposite side. The bar could be rotated to start in any one of the four  
203 cardinal directions or the four oblique directions, giving eight different trial types. In one run, all  
204 eight different trial types were presented, along with two null trials where no bar was present. The  
205 null trials were always presented as the 5<sup>th</sup> and 10<sup>th</sup> trials. The order of the other directions was fixed  
206 for all participants and went anticlockwise from the first direction, which was where the bar was  
207 horizontal, starting at the top of the screen and moving downwards.

208

209 There were three different stimulus conditions that could be presented in a given run to the  
210 participants. In each condition, the dots within the bar always moved in the same way; what differed  
211 between conditions was the movement of the background dots outside the bar area.

212

213 In the ‘bar-only’ condition, only the dots within the bar were visible, and therefore the bar appeared  
214 to be moving across a grey background. In the ‘kinetic’ condition, the dots outside the bar (within  
215 the circular stimulus region) were always moving in the opposite direction to the dots within the bar,  
216 creating a ‘shearing’ effect which made the bar visible. In the ‘global’ condition, the dots outside the  
217 bar moved in random directions, allowing the bar to be detected as a 100% coherent global-motion  
218 stimulus against a background of noise in adjacent areas of the stimulus. While this condition  
219 therefore also contained kinetic boundaries, they were far less clear than the opposing directions

220 used in the 'kinetic' stimulus. When a dot moved into the bar area (either through its normal  
221 progression or through a shift of the bar region), it started to move in the same coherent direction  
222 as all other bar dots. Similarly, when a dot left the bar area, it began to move randomly again. In all  
223 conditions, the null trials (with no bar present) had the same background motion as during the bar  
224 trials; a blank screen for the 'bar-only' condition, coherent motion in the 'kinetic' condition and  
225 random motion in the 'global' condition.

226

227 In all conditions, dots within the bar all moved in the same direction and moved along the length of  
228 the bar (so if the bar was moving from the top to the bottom of the screen, the dots moved from left  
229 to right or vice versa). All the dots (in both bar and background) changed direction by 180 degrees  
230 every 0.5 seconds, to prevent adaptation to one motion direction. Dots moved at  $0.8^\circ/\text{second}$  in all  
231 conditions. If any dots moved outside the aperture during the experiment, they were moved back  
232 one aperture width in the appropriate direction.

233

234 Each trial took 25 seconds, meaning that a run took 4 minutes and 10 seconds (plus a short period at  
235 the beginning of the run that was used to ensure that the fMRI signal had reached equilibrium). Each  
236 participant completed 4 runs for each condition, giving a total of 12 runs in the entire experiment.  
237 The order of the different conditions varied for different participants to control for order effects.

238

### 239 *2.1.3. Fixation task*

240 Participants were instructed to focus on a blue fixation dot (diameter =  $0.17^\circ$ ) at all times and to  
241 press a button on an MRI-compatible button box when they saw it change colour (to a red-purple).  
242 The probability of the blue dot changing colour was 0.01 every 200ms and the colour change periods  
243 lasted 200ms each. The results of this attentional task were unrecorded, and simply served to keep  
244 the participant fixated and alert throughout the experiment. An eye tracker (Eyelink 1000, sampling  
245 at the screen refresh rate of 60Hz) was used to monitor eye movements and ensure that participants  
246 were fixating correctly. We determined gaze stability using the methods outlined in (**Haas and**  
247 **Schwarzkopf, 2018**); briefly, this involves calculating the median absolute deviation of the sampled  
248 gaze positions along both the horizontal and vertical dimensions for each run, and using these  
249 measures to compare the stability of gaze across conditions. Any run where fewer than 10 valid  
250 samples were taken was removed from further analysis. One participant was not eye tracked during  
251 either experiment, and therefore eye tracking data reflects the average of four participants in both  
252 Experiments 1 and 2. Analysis of the difference in eye position between conditions (both in the x and  
253 y directions) used general linear mixed models (using condition as a fixed factor, and subject and



254 repeat number as random factors) followed by posthoc pairwise comparisons, with packages lme4  
255 (**Bates et al., 2014**) and emmeans (**Russell, 2018**) in R (version 3.5.0).

256

#### 257 *2.1.4. Data acquisition*

258 Scans were acquired using a Siemens Avanto 1.5T MRI scanner with a 32-channel Siemens head coil  
259 located at the Birkbeck-UCL Centre for Neuroimaging. We used a modified version of the head coil  
260 without the eye visor to allow an unrestricted view of the screen, leaving 30 effective channels. We  
261 used functional T2\*-weighted multiband 2D echo planar imaging with a multiband sequence (Breuer  
262 et al., 2005) and the following properties: voxel size = 2.3mm isotropic, field of view = 96 x 96, 36  
263 slices, repetition time (TR) = 1s, echo time (TE) = 55ms, flip angle = 75°, and acceleration factor = 4.  
264 We collected 260-262 volumes (depending on stimulus condition) per run, and 4 runs were collected  
265 per condition for each participant. We also acquired a T1-weighted anatomical magnetisation-  
266 prepared rapid acquisition with gradient echo (MPRAGE) scan for each participant (TR = 2730ms, TE  
267 = 3.57ms) with a resolution of 1mm isotropic voxels.

268

#### 269 *2.1.5. Analysis*

270 The method used for analysing pRFs has been described previously (**Alvarez et al., 2015; Dumoulin**  
271 **and Wandell, 2008; Moutsiana et al., 2016; Schwarzkopf et al., 2014; van Dijk et al., 2016**). In brief,  
272 the SamSrf MATLAB toolbox (available at <http://dx.doi.org/10.6084/m9.figshare.1344765>) models  
273 the pRF of each voxel as a 2D Gaussian in the visual field, incorporating a canonical haemodynamic  
274 response function based on the average of 26 participants in a previous study (**Haas et al., 2014**). For  
275 each voxel the model finds the best-fitting visual field location, spread (standard deviation), and  
276 overall response amplitude of the pRF function.

277

278 Preprocessing of the fMRI data was carried out using SPM12 (Wellcome Centre for Human  
279 Neuroimaging, London, <http://www.fil.ion.ucl.ac.uk/spm/software/spm12/>). The first 10-12 volumes  
280 (depending on stimulus condition) were removed to allow the signal to reach equilibrium, leaving  
281 250 volumes to be used in analysis for all participants and conditions. We then carried out intensity  
282 bias correction, realignment, unwarping and coregistration of the functional data to the structural  
283 scan, all using the default parameters built into the SPM software. FreeSurfer  
284 (<https://surfer.nmr.mgh.harvard.edu/fswiki>) was used to generate a 3D reconstruction of the grey-  
285 white matter surface (**Dale et al., 1999; Fischl et al., 1999**), and the functional data was then  
286 projected to the cortical surface by finding the median position for each vertex of the surface  
287 reconstruction between the pial and grey-white matter boundary. Linear detrending was applied to

288 the time series from each vertex in each run, and runs of the same stimulus condition were z-  
289 standardised and averaged together.

290

291 Population receptive field analysis was carried out on the occipital lobe data in a two-stage  
292 procedure. With a binary aperture describing the position of the bar element within each stimulus  
293 for each scanning volume (which was identical in each condition), we calculated its overlap with a  
294 profile of a pRF to predict the fMRI time series in the experiment. We first carried out a coarse grid  
295 search fit on data smoothed with a large kernel on the spherical surface (full width half maximum =  
296 5), allowing calculation of the three pRF parameters that gave the maximal Pearson's correlation  
297 between the predicted and observed time series for the full set of search grid parameters and  
298 vertices. These parameters were then used to seed an optimisation algorithm (**Lagarias et al., 1998**;  
299 **Nelder and Mead, 1965**) in a slow fine fit procedure on a vertex by vertex basis using unsmoothed  
300 data, allowing refinement of the parameter estimates and the calculation of an estimate of response  
301 strength.

302

303 Visual areas V1, V2 (dorsal and ventral), V3 (dorsal and ventral), V3A, V3B and MT+ (defined as TO1  
304 and TO2; see supplementary materials for an example) were delineated based on reversals in the  
305 polar angle map from the 'bar-only' stimulus condition (**Sereno et al., 1995**). For participants who  
306 only completed Experiment 2, the 'transparent bar-only' condition was used instead. These regions  
307 can be seen in Figure 2 and Figure 7. Throughout our main analyses, we used an  $R^2$  (goodness-of-fit)  
308 threshold of 0.05, which corresponds in our dataset to a p-value of 0.000367 (due to the number of  
309 observations per dataset and the number of free parameters in the pRF model). As our experimental  
310 conditions often show relatively weak and sparse responses, we chose this relatively liberal  
311 threshold to enable us to analyse the residual responses. However, we also carried out all analyses  
312 using a more conservative  $R^2$  value of 0.1, and results from these analyses can be seen in the  
313 supplementary material.

## 314 **2.2. Results and Discussion**

### 315 *2.2.1 Relationships between maps*

316 Figure 2 shows the left hemisphere polar angle maps for each experimental condition and each  
317 participant in Experiment 1 ( $R^2$  threshold = 0.05). Visual inspection of these images suggests that the  
318 'bar-only' condition (Figure 2A) produces the clearest polar angle maps across participants, while the  
319 'kinetic' condition (Figure 2B) tends to show a similar, if weaker pattern. The 'global' stimulus (Figure  
320 2C) shows a weaker response still, with lower visual areas (e.g. V1) showing very little response.

321 Although we had a relatively small number of participants, these general trends are highly  
322 consistent.

323

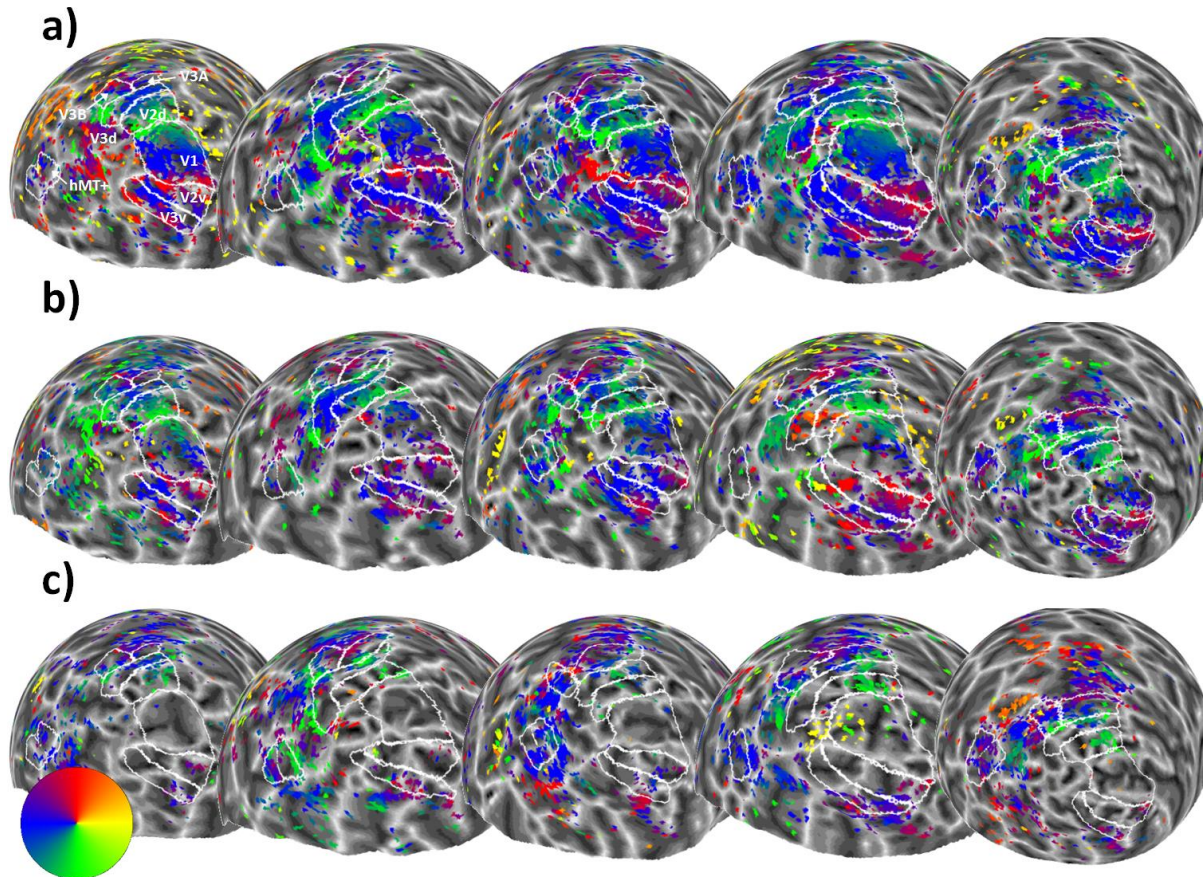

324

325 **Figure 2.** Sphere projection of polar angle data for the left hemispheres of all participants in Experiment 1. The  
326 colour of each vertex indicates the polar angle for the corresponding pRF centre (as indicated by the colour  
327 wheel). Each person's data forms a column (subject 1 is on the far left, and subject 5 is on the far right), and  
328 stimulus condition forms a row. Manual delineations of visual areas V1, V2, V3, V3A, V3B and hMT+ (TO1/2) are  
329 shown. (a) Polar angle estimates for the 'bar-only' stimulus condition. (b) Polar angle estimates for the 'kinetic'  
330 stimulus condition. (c) Polar angle estimates for the 'global' stimulus condition.

331

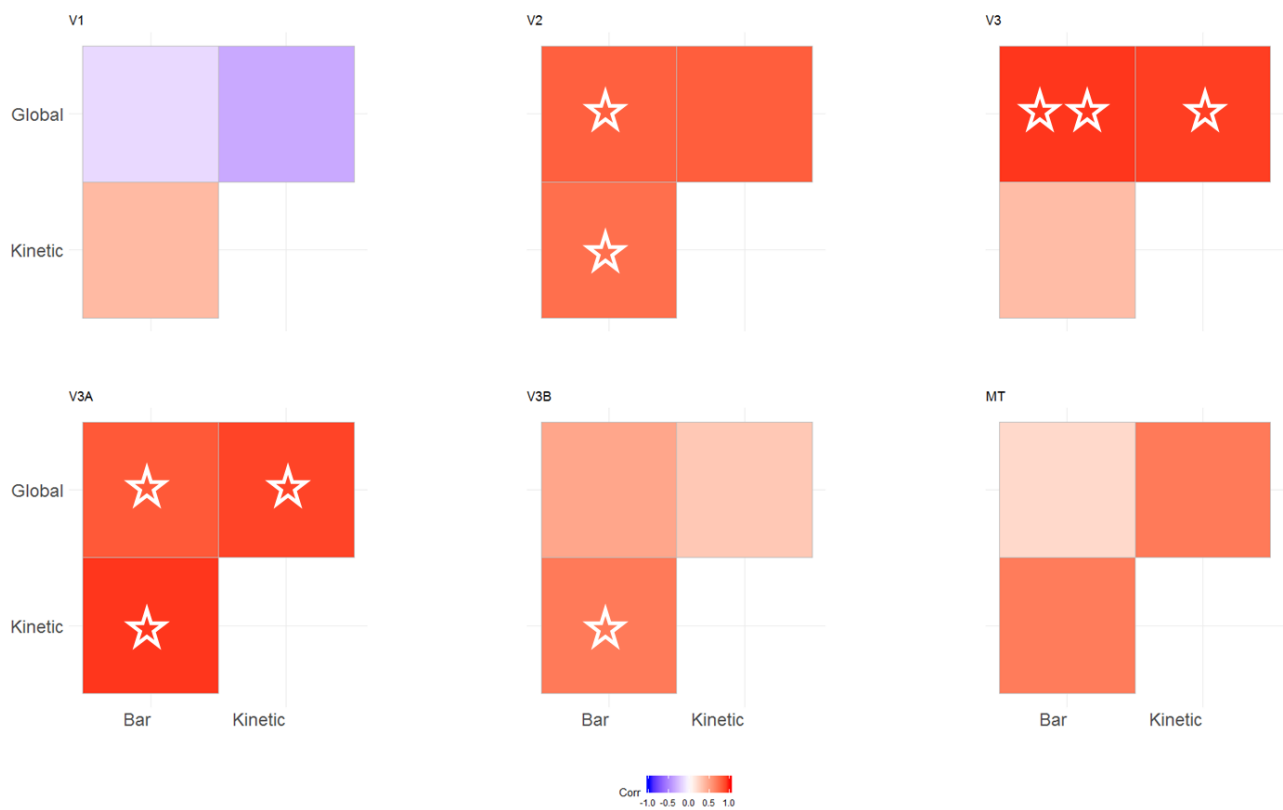

332

333 **Figure 3.** Correlation matrices comparing pRF polar angles between stimulus conditions in Experiment 1. The  
334 colour of each cell indicates the strength and sign of each vertex-wide correlation in polar angle. Circular  
335 correlations were calculated for each participant, then Z transformed and averaged across participants (as in  
336 (Haas and Schwarzkopf, 2018)). The symbols indicate whether the average correlation in individual cells is  
337 significantly different from zero (uncorrected). One star =  $p < 0.05$ . Two stars =  $p < 0.001$ .

338 In order to quantify the consistency of these maps, we determined the correlation between the  
339 values for polar angle obtained for each vertex with each stimulus. As shown in Figure 3, the  
340 correlation between these polar angle estimates was overall clear, particularly for visual areas V2,  
341 V3, V3A and V3B where the average correlation was significantly different from zero. The correlation  
342 between conditions was less clear in V1 and MT+.

343 We next determined the proportion of vertices within each of these visual areas responding  
344 retinotopically in the three experimental conditions (goodness of fit of the pRF model  $R^2 > 0.05$ ,  
345 Figure 4A). The bar stimulus produced the biggest response in areas V1-V3, which then dropped off  
346 for the higher visual areas (V3A, V3B and MT+). In contrast, responses to the kinetic stimulus  
347 increased across areas V1-V3, levelling off at V3A-V3B and then dropping in MT+. Responses to the  
348 global stimulus were even lower in the early visual areas, but again increased, reaching a peak at

349 V3A and V3B. There were therefore large differences in stimulus responsivity in V1-V3, but these  
350 differences were much reduced in the higher visual areas. There was a significant interaction  
351 between condition and visual area in the final model of the data (interaction:  $\chi^2 = 336.06$ ,  $p < 0.001$ ;  
352 main effect of visual area:  $\chi^2 = 141.63$ ,  $p < 0.001$ ; main effect of condition:  $\chi^2 = 377.49$ ,  $p < 0.001$ ).  
353 This interaction also helps to explain the lack of significant correlation in polar angle values between  
354 conditions in area V1 (Figure 3) – although the bar stimulus produced clear polar angle estimates in a  
355 large number of V1 voxels, this was far less so for the other two stimuli.

356 Comparing the goodness of fit across conditions (Figure 4B) showed a similar pattern, with initially  
357 large differences in  $R^2$  between conditions in the early visual areas that again decreased in higher  
358 regions. This interaction between condition and visual area was again significant (interaction:  $\chi^2 =$   
359  $60.629$ ,  $p < 0.001$ ; main effect of visual area:  $\chi^2 = 62.747$ ,  $p < 0.001$ ; main effect of condition:  $\chi^2 =$   
360  $242.912$ ,  $p < 0.001$ ). The area with the highest average  $R^2$  value also differed for each condition; the  
361 peak was in V3 for the bar stimulus, V3A for the kinetic stimulus and V3B for the global stimulus.

362 Finally, we analysed pRF size across conditions and visual areas (Figure 4C). Mean pRF sizes were  
363 smallest in the early visual areas, V1-V3, increasing in higher regions. pRFs were also relatively  
364 similar in early visual areas for all three conditions, but clear differences emerged in V3A, V3B and  
365 MT+. Here, pRFs were largest for the bar condition, smaller for the kinetic condition, and smaller  
366 again for the global condition (though in all cases larger than the equivalent condition in earlier  
367 regions). Again, there was a significant interaction between condition and visual area (interaction:  $\chi^2$   
368  $= 47.879$ ,  $p < 0.001$ ; main effect of visual area:  $\chi^2 = 174.505$ ,  $p < 0.001$ ; main effect of condition:  $\chi^2 =$   
369  $24.434$ ,  $p < 0.001$ ). Similar results were seen when pRF size was examined as a function of  
370 eccentricity in the different brain areas and experimental conditions (see Supplementary Figure 2).  
371 pRF size was found to increase as a function of eccentricity in all brain areas, with the lowest rate of  
372 increase for the global condition.

373

374

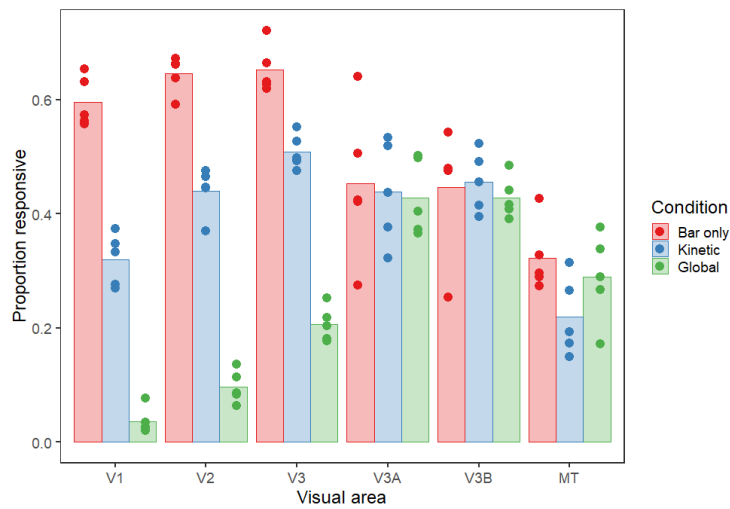

375

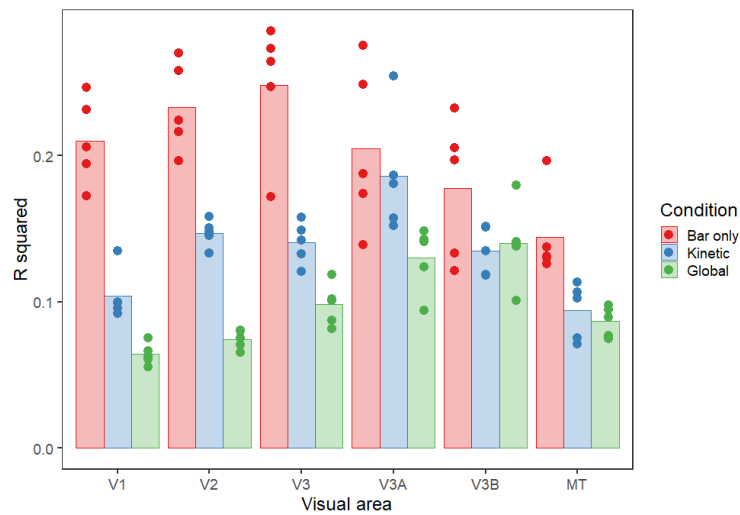

376

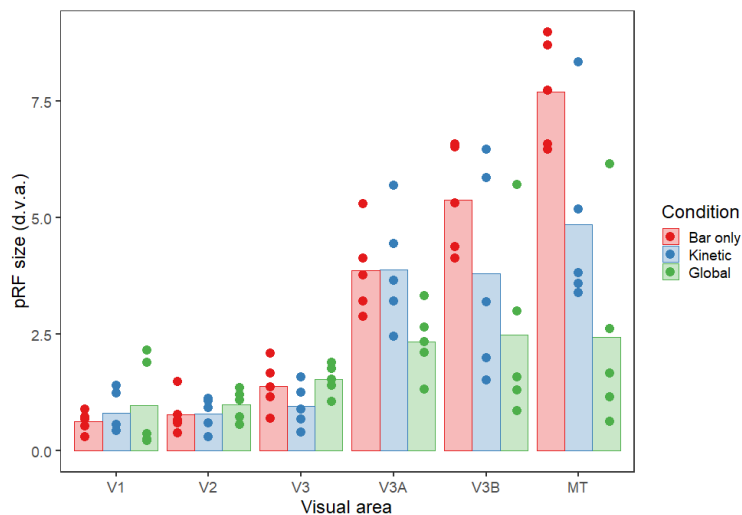

377

378 **Figure 4. (a)** Proportion of vertices responding, **(b)** goodness-of-fit and **(c)** pRF sizes for each condition and  
379 visual area in Experiment 1. The bars show the mean values across all subjects, and the points are individual  
380 data for each subject. In (a), this is the mean proportion of vertices responding for each subject, whereas for (b)  
381 and (c) these are the median goodness-of-fit values and pRF sizes respectively.

382

### 383 2.2.2 Control analyses

384 As there were clear differences in the proportion of responsive voxels in the three conditions, it is  
385 possible that the differences in pRF size between conditions were due to this reduction in the voxels  
386 included in each analysis, rather than a specific change in pRF size within each voxel. To examine this  
387 possibility, we analysed the data for the 'bar-only' condition using just the voxels that survived  
388 thresholding for the kinetic and global conditions (see Figure 5). The pattern of results is similar to  
389 Figure 4C – pRF sizes were again comparable in early visual areas for the three conditions, with clear  
390 reductions in pRF size for the kinetic and global conditions in areas V3A, V3B and MT+. In this case  
391 however, the reduction can be attributed to the differential selection of voxels responding to the  
392 same stimulus. In other words, the observed pRF size differences in Figure 4C are likely due to  
393 changes in the voxels that respond to these stimuli rather than active changes in pRF size across the  
394 different conditions. Using a linear model to compare the kinetic and global vertex conditions from  
395 the control analysis with the kinetic and global data in the original analysis showed no significant  
396 difference between the two data sets ( $\chi^2 = 0.758$ ,  $p = 0.384$ ).

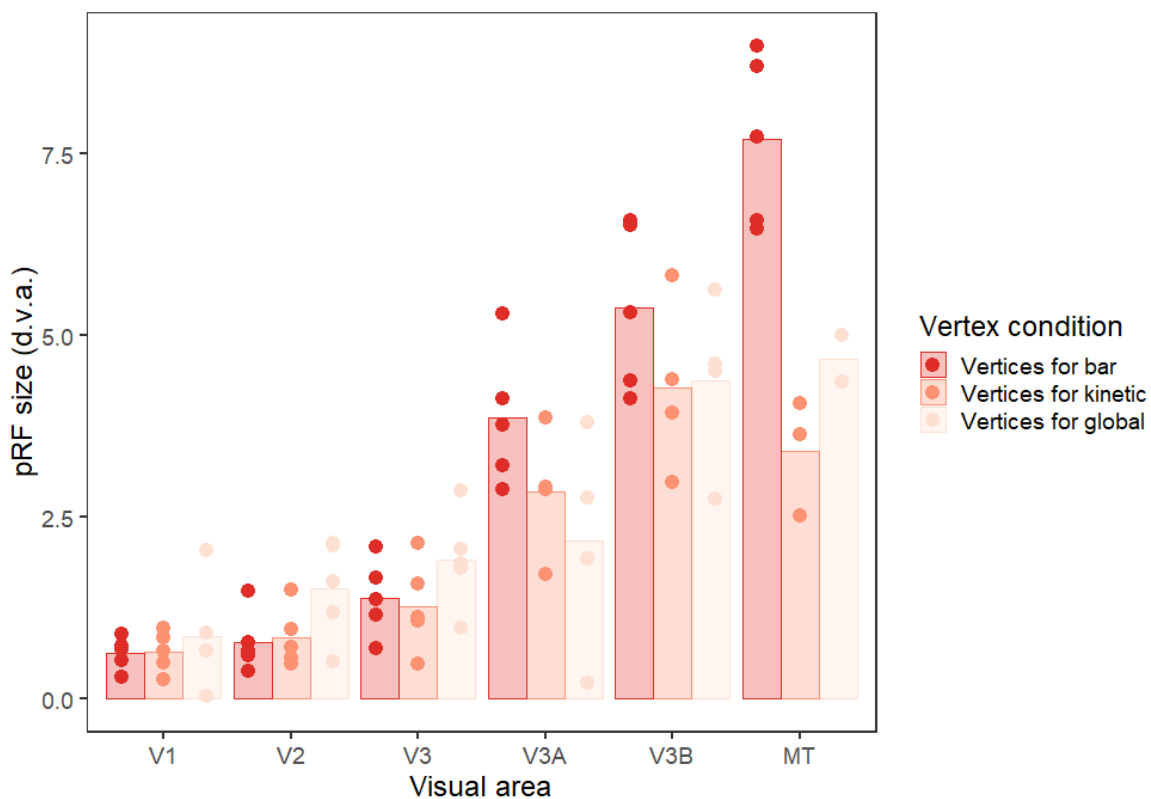

397

398 **Figure 5.** Plot to show pRF sizes for each visual area in Experiment 1 for the bar-only condition, using the responsive  
399 vertices for all three conditions. The bars show the mean values across all subjects, and the points are individual data  
400 for each subject (median pRF sizes). Any data points with a value of zero (obtained if the vertices for the condition

401 did not overlap with any bar activation) were removed before plotting, leading to unequal numbers of data points in  
402 each condition.

403 It is also possible that differences between conditions could be attributed to differences in fixation  
404 stability between conditions. In a second control analysis we therefore examined the median  
405 absolute deviations of eye position, which on average were highly consistent and relatively low for  
406 both horizontal and vertical eye movements, averaging less than 0.5 degrees of visual angle for  
407 every condition (see Figure 6). General linear mixed models followed by posthoc pairwise  
408 comparisons suggested that there were no significant differences in eye position between  
409 conditions, either for the X or the Y direction (for X, bar-kinetic:  $t_{30.14} = 0.356$ ,  $p = 0.933$ , bar-global:  
410  $t_{30.26} = 0.457$ ,  $p = 0.892$ , kinetic-global:  $t_{30.35} = 0.101$ ,  $p = 0.994$ . For Y, bar-kinetic:  $t_{30.35} = -0.614$ ,  $p =$   
411  $0.814$ , bar-global:  $t_{30.14} = -0.503$ ,  $p = 0.871$ , kinetic-global:  $t_{30.43} = 0.111$ ,  $p = 0.993$ ). Differences in  
412 fixation are therefore unlikely to have produced the above differences in pRF properties.

413

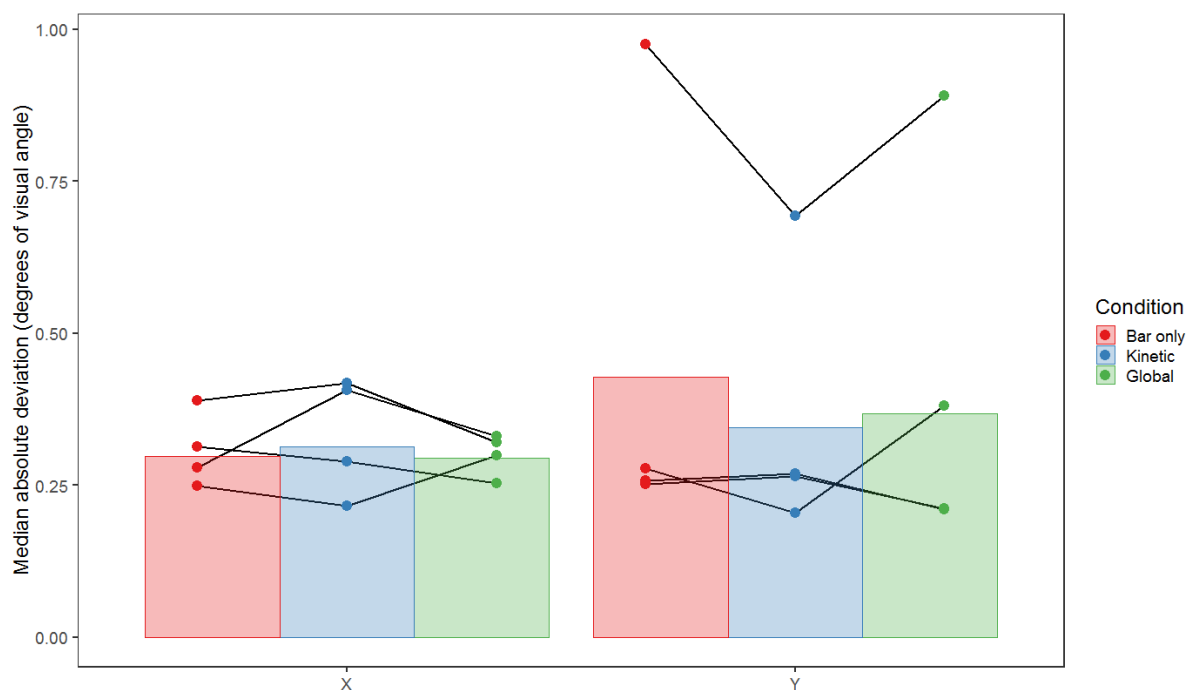

414

415 **Figure 6.** Plot showing the mean of the median absolute deviation of eye position across runs, conditions and  
416 observers ( $n = 4$ ) for both the X (horizontal) and Y (vertical) dimensions of Experiment 1, in degrees of visual  
417 angle. Error bars are  $\pm 1$ SD of the mean. Lines connect data points from individual subjects.

### 418 2.2.3 Experiment 1 summary

419 Altogether, the three stimulus types (bar-only, kinetic, and global) produced clear differences in  
420 responsivity, goodness-of-fit, and pRF size across the visual hierarchy. Our control analyses reveal  
421 that these differences cannot be attributed to differences in gaze stability between the conditions



422 and that the observed differences in pRF size are unlikely to reflect stimulus-driven changes in pRF  
423 size within each voxel. Rather, it seems likely that the observed differences in pRF size can be  
424 attributed to responses from different sub-populations of voxels in the three different conditions.  
425 We next turn our attention to the source of the differences in responsivity that appear to be driving  
426 these differences in pRF size. In particular, it is possible that differences in the visibility or salience of  
427 the bar between these conditions could drive the differences in responsivity. We explore this  
428 possibility in Experiment 2.

### 429 **3. Experiment 2**

430 As outlined in the introduction, estimates of pRF size and visual field location have been found to  
431 vary according to both the properties of the mapping stimulus and the attentional state of the  
432 observer. Although it is tempting to attribute the differences observed in Experiment 1 to  
433 differences in the effectiveness of these stimuli at driving the selectivity of various stages of the  
434 motion-processing hierarchy, the visibility of the bar element in each of our stimuli also varied  
435 between the three conditions. Most participants in Experiment 1 informally noted that the bar was  
436 less clear in the global condition than in the kinetic or bar-only conditions. It is possible then that the  
437 differences observed were driven by the visibility or salience of the bar, rather than any difference in  
438 the underlying selectivity of the motion detectors in each brain region.

439 In Experiment 2 we sought to test this by comparing the bar-only stimulus with two new stimuli.  
440 Firstly, we devised a second form of stimulus defined by global motion, a ‘transparent’ stimulus  
441 where the bar contained two sets of dots moving in opposite directions to give the appearance of  
442 two sheets moving transparently across each other (**Snowden and Verstraten, 1999**). The global  
443 percept of these two directions requires an integration across space that is similar to that for a single  
444 direction of global motion amongst noise (**Edwards and Greenwood, 2005; Edwards and Nishida,**  
445 **1999**). Transparent motion is not perceived when dots with opposing directions are ‘locally  
446 balanced’ within small regions of the visual field (**Qian et al., 1994**), perhaps due to an intermediate  
447 process of ‘local-motion pooling’ prior to the global-motion stage (**Edwards et al., 2012;**  
448 **Vidnyánszky et al., 2002**). Although the responses of V1 neurons cannot distinguish between  
449 transparent and non-transparent stimuli, both fMRI (**Muckli et al., 2002**) and electrophysiological  
450 studies (**Qian and Andersen, 1994; Snowden et al., 1991**) show a differential response within  
451 MT/V5. Transparent-motion stimuli thus offer another stimulus with which we can assess whether  
452 pRF parameters differ when stimuli preferentially drive higher levels of the motion-processing  
453 hierarchy. We therefore constructed bar stimuli with two opposing directions of transparent motion  
454 within the bar, presented against a background of locally-balanced dots that do not appear

455 transparent. If the differences in pRF parameters found in Experiment 1 are due to differences in  
456 motion selectivity, we would expect the transparent-motion bar stimulus to produce weaker  
457 responses in lower visual areas and a reduction in pRF size in higher visual areas, as with the 'global'  
458 condition.

459 Our second comparison stimulus was intended to examine the role of stimulus visibility in these  
460 effects. Transparent motion in particular has been found to be less visible in peripheral vision than in  
461 the fovea (**De Bruyn, 1997**), which would likely create issues for the visibility of our transparent bar  
462 stimuli as they traverse the visual field, just as it may have been an issue in Experiment 1. We  
463 therefore compared these transparent stimuli with a stimulus bar that was not defined by  
464 differences in motion, but rather by a subtle difference in stimulus dot size. This bar stimulus would  
465 likely differentially drive the responses of early visual areas, given their potential role in the  
466 perception of object size (**Moutsiana et al., 2016; Murray et al., 2006; Pooresmaeili et al., 2013;**  
467 **Sperandio et al., 2012**), but should not differentially drive the responses of higher motion-selective  
468 regions as effectively as the motion-defined bars used previously. The size difference in these stimuli  
469 does however lead to a substantial reduction in the visibility of the bar stimulus relative to the bar-  
470 only condition, particularly in peripheral vision. In particular, we selected a size difference that  
471 produced a similar level of subjective visibility to the 'transparent' condition (examined during pilot  
472 testing). Were this size-defined condition to produce similar responses to the motion-defined  
473 condition, this would suggest that visibility or salience is a more likely explanation for the observed  
474 differences than the stimulus selectivity of the underlying neural populations.

### 475 **3.1. Materials and Methods**

#### 476 *3.1.1. Participants*

477 Five participants (two male) took part in Experiment 2, including all four authors and one non-author  
478 participant from the first experiment (age range 28-39 years, mean age: 32.6 years). One participant  
479 was left handed. All had normal or corrected-to-normal visual acuity and provided written consent,  
480 as in Experiment 1.

#### 481 *3.1.2. Stimuli*

482 The second experiment was set up with the same apparatus and general stimulus properties as the  
483 first. Here there were three conditions related to the mapping stimuli: 'bar-only', 'transparent' and  
484 'size-defined'. The 'bar-only' condition in this experiment was identical to the 'bar-only' condition in  
485 Experiment 1, except that the dots were paired such that the two dots in each pair travelled in the  
486 same direction. However, different pairs travelled in opposite directions to give the impression of

487 transparent motion with two 'sheets' of dots travelling over each other in opposite directions. As in  
488 the 'bar-only' condition of Experiment 1, the null trials for this condition contained only the uniform  
489 grey background. The speed of the dots was reduced in this condition to 0.34°/second to increase  
490 the impression of transparency.

491

492 In the 'transparent' condition, the bar was identical to the bar in the 'bar-only' condition. In this case  
493 however, the background also contained paired dots, with each dot in the pair moving in opposite  
494 directions, leading to the perception of non-transparent motion (as with 'locally paired' dot stimuli  
495 used previously; (Qian et al., 1994). To keep dots within these local regions and avoid them  
496 unpairing over time, the motion of the dots periodically reversed. The timing of these reversals was  
497 randomised across dot pairs, so that reversals did not occur for all of the dots at the same time, a  
498 feature that enhances the percept of transparent sheets moving across one another (Kanai et al.,  
499 2004) when dot trajectories are limited (though not when locally paired, as in the background). The  
500 consistent pairing of dots between bar and background (differing only in their consistent vs opposing  
501 directions) meant that bar and background did not differ in dot density, and that the only feature to  
502 distinguish the bar was the percept of transparency against a background of non-transparent flicker.

503

504 The 'size-defined' condition contained a bar that was defined by a difference in dot size rather than  
505 by motion type; the dots in the bar were 0.10° in diameter against a background of dots with 0.09°  
506 diameter. All the dots in this condition moved in random directions, though with the same frequency  
507 of direction reversal as in the other two conditions (i.e. dots oscillated back-and-forth along a  
508 randomly selected axis). Null trials for this condition were the same as for the 'global' condition in  
509 Experiment 1.

510

511 To minimize anticipation effects in this experiment, the starting orientation and direction of the  
512 sequence (anticlockwise or clockwise shifts) was randomised for each condition and participant but  
513 kept constant across the four runs. Note that this meant that the movement direction of the bar  
514 always changed in a sequential fashion. All other presentation and analysis procedures were as in  
515 Experiment 1.

## 516 **3.2. Results and Discussion**

### 517 *3.2.1 Relationships between maps*

518 As in Experiment 1, the bar-only stimulus produced clear and consistent polar maps across  
519 participants (Figure 7A). However, the transparent and size-defined stimuli produced much weaker

520 and more variable maps (Figure 7B & C), particularly in lower visual areas (e.g. V1) where responses  
521 were considerably reduced. Interestingly, participants who self-reported that they were frequently  
522 unable to detect the transparency or size-defined bar stimuli (shown by red crosses in Figure 7) also  
523 had virtually no discernable map structure for these conditions.

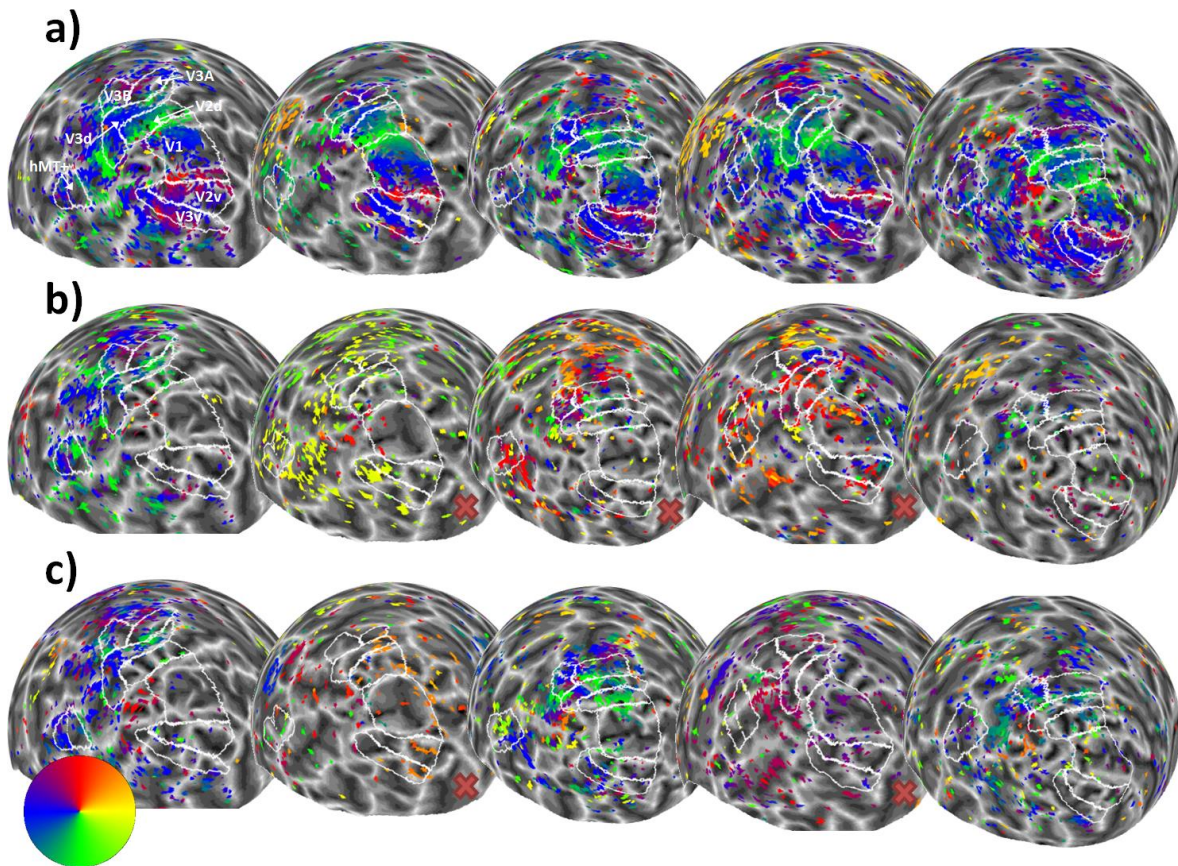

524

525 **Figure 7.** Sphere projection of polar angle data for the left hemispheres of all participants in Experiment 2. The  
526 colour of each vertex indicates the polar angle for the corresponding pRF centre (as indicated by the colour  
527 wheel). Each person's data forms a column (subject 1 is on the far left and subject 5 is on the far right), and  
528 stimulus condition forms a row. Manual delineations of visual areas V1, V2, V3, V3A, V3B, and hMT+ (TO1/2)  
529 are shown (if the subject had taken part in Experiment 1, the delineations from this experiment were used). (a)  
530 Polar angle estimates for the 'bar-only' stimulus condition. (b) Polar angle estimates for the 'transparent'  
531 stimulus condition. (c) Polar angle estimates for the 'size-defined' stimulus condition. Red crosses indicate  
532 where participants self-reported low awareness of the stimulus when questioned after the experiment.

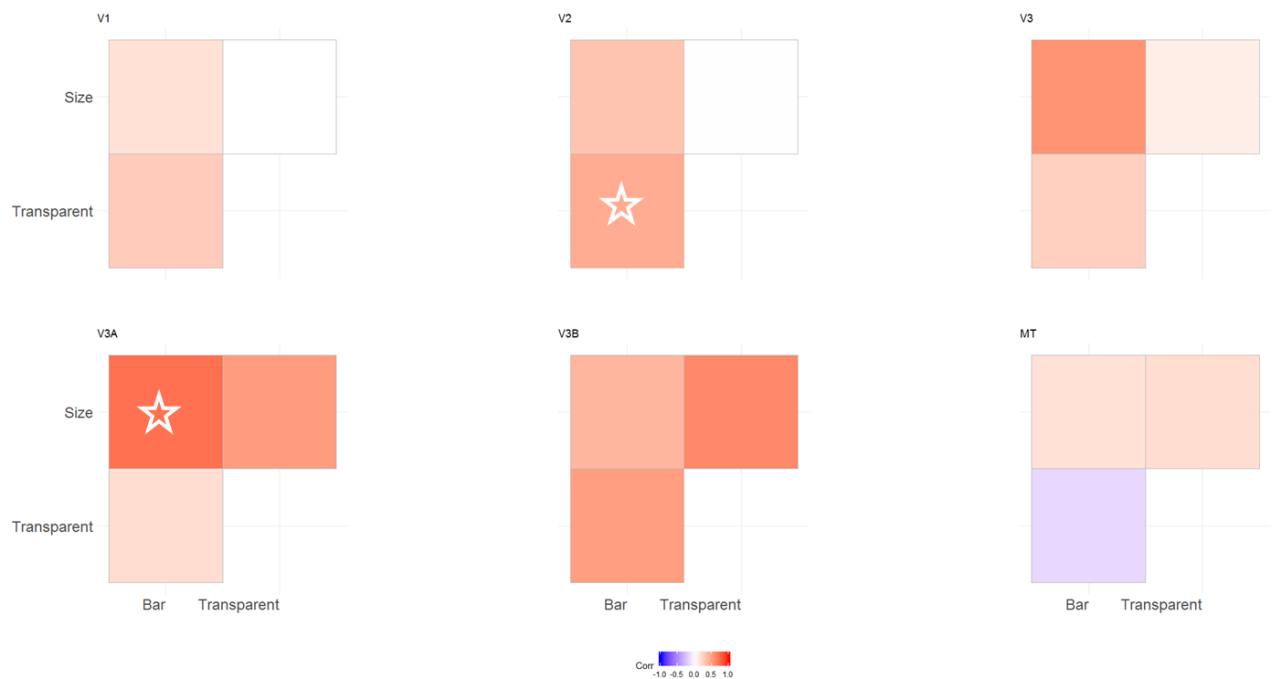

533

534 **Figure 8.** Correlation matrices comparing pRF polar angles between stimulus conditions in Experiment 2. The  
535 colour of each cell indicates the strength and sign of each vertex-wide correlation in polar angle. Circular  
536 correlations were calculated for each participant, then Z transformed and averaged across participants (as in  
537 (Haas and Schwarzkopf, 2018)). The symbols indicate whether the average correlation in individual cells is  
538 significantly different from zero (uncorrected). One star =  $p < 0.05$ . Two stars =  $p < 0.001$ . Note: one participant  
539 did not have enough data for valid correlations in the size-defined condition in V3B and MT, and so their data  
540 was not used for the average calculation).

541 Correlations between these polar angle estimates in the 3 conditions were in general slightly weaker  
542 than in Experiment 1, but were still generally positive, with significant correlations overall only in  
543 areas V2 and V3A. As in Experiment 1, we next determined the proportion of vertices responding  
544 retinotopically in the different experimental conditions (see Figure 9A). Here, the bar-only condition  
545 produced similar response levels to the equivalent condition in Experiment 1, with these levels again  
546 decreasing in higher regions. In comparison, the transparent and size-defined conditions showed  
547 greatly reduced responsivity in early visual areas, similar to the global condition in Experiment 1.  
548 Responsivity in these conditions increased in later visual areas, though not quite to the level of the  
549 bar-only stimulus (unlike the global condition). There was a significant interaction between condition  
550 and visual area in the final model (interaction:  $\chi^2 = 52.330$ ,  $p < 0.001$ ; main effect of visual area:  $\chi^2 =$   
551  $24.933$ ,  $p < 0.001$ ; main effect of condition:  $\chi^2 = 223.071$ ,  $p < 0.001$ ). This interaction is again likely to  
552 explain the lack of significant correlations in polar angle values between conditions, here given the  
553 clear drop in responsivity for the latter two stimulus types across the visual hierarchy.

554 Goodness of fit also matched the pattern observed in Experiment 1, with the bar-only stimulus  
555 having much better goodness of fit compared to the transparent and size-defined stimuli. Goodness  
556 of fit was also worst in V1 and MT for all conditions, with  $R^2$  values increasing for more intermediate  
557 visual areas (Figure 9B). Modelling of the goodness of fit showed that there was no significant  
558 interaction between condition and visual area, ( $\chi^2 = 16.505$ ,  $p = 0.086$ ). However, there were  
559 significant main effects of visual area ( $\chi^2 = 30.060$ ,  $p < 0.001$ ) and condition ( $\chi^2 = 289.304$ ,  $p < 0.001$ ).

560 Finally, we considered differences in pRF size for the different conditions and visual areas (Figure  
561 9C). Again, as in Experiment 1 there was a highly significant interaction between condition and visual  
562 area (interaction:  $\chi^2 = 64.806$ ,  $p < 0.001$ ; main effect of visual area:  $\chi^2 = 72.031$ ,  $p < 0.001$ ; main effect  
563 of condition:  $\chi^2 = 21.572$ ,  $p < 0.001$ ). With the bar-only stimulus, pRF size increases dramatically  
564 across visual areas, with values comparable to those of Experiment 1. Although pRF values for the  
565 transparent and size-defined stimuli are comparable in early areas, the rate of increase is much  
566 lower than in the bar-only condition, resulting in considerably smaller pRFs in the highest areas. In  
567 MT these values were broadly comparable to the global condition of Experiment 1 for the size-  
568 defined stimulus, though generally much smaller for the transparent stimulus. pRF size also  
569 increased as a function of eccentricity in all different brain areas and experimental conditions,  
570 particularly for the bar-only stimulus (see Supplementary Figure 3).

571

572

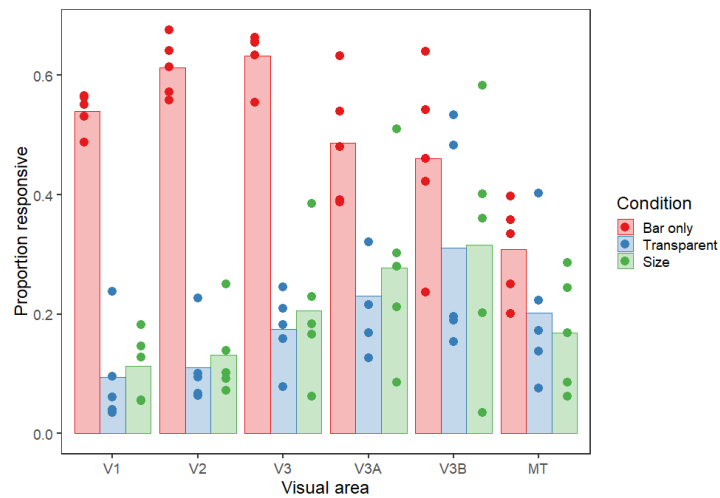

573

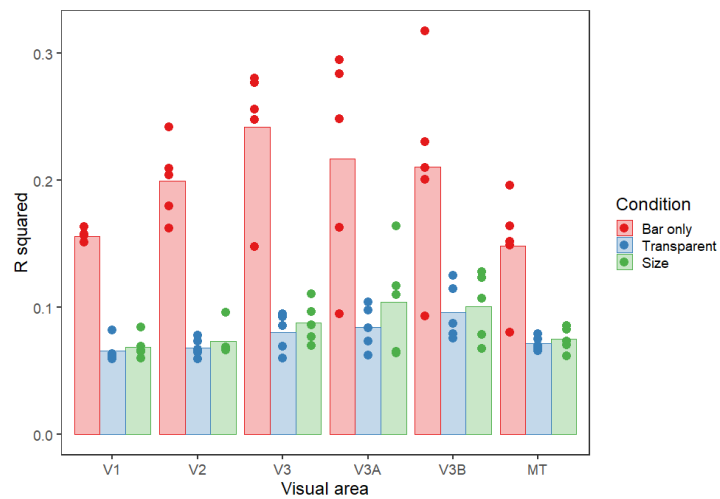

574

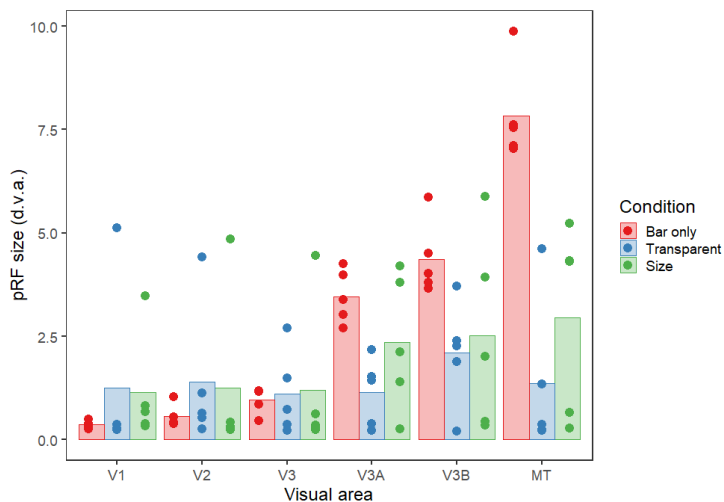

575

576 **Figure 9. (a)** Proportion of vertices responding, **(b)** goodness-of-fit and **(c)** pRF sizes for each condition (bar-only,  
577 transparent, and size-defined) and visual area in Experiment 2. The bars show the mean values across all subjects, and the  
578 points are individual data for each subject. In (a), this is the mean proportion of vertices responding for each subject,  
579 whereas for (b) and (c) these are the median goodness-of-fit values and pRF sizes respectively.

580

581 *3.2.2 Control analyses*

582 As in Experiment 1, a control analysis was run to examine whether the above differences in pRF size  
583 between conditions were due to this reduction in the voxels included in each analysis. We again  
584 analysed data for the bar-only condition using just the voxels that survived thresholding for the  
585 transparent and size-defined conditions. This again produced a clear reduction in pRF size for these  
586 two conditions in areas V3A, V3B and MT, suggesting that the observed differences in pRF size may  
587 be predominantly explained by differences in the responsivity of voxels (Figure 10). This is supported  
588 by statistical analysis suggesting that there is no significant difference between the transparent and  
589 size-defined conditions in the control analysis and in the original experimental analysis ( $\chi^2 = 0.111$ ,  $p$   
590 = 0.739).

591

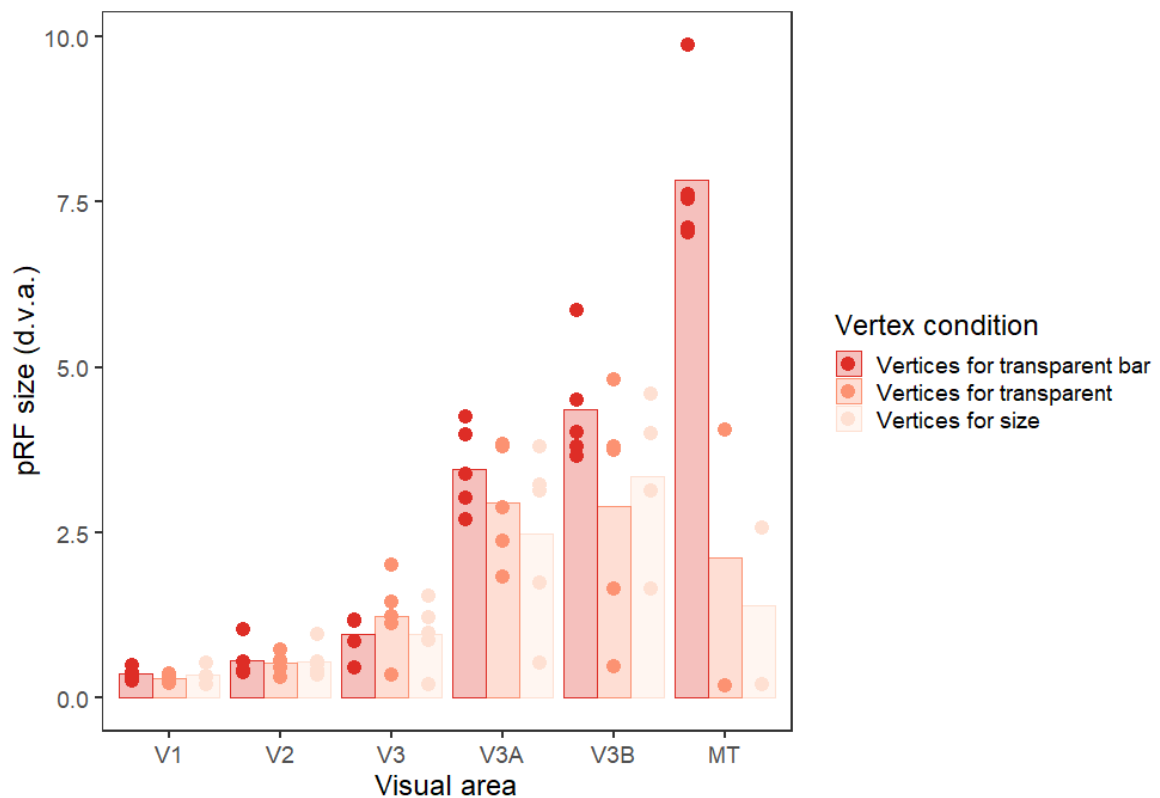

592

593 **Figure 10.** Plot to show pRF sizes for each condition and visual area in Experiment 2 for the transparent bar-  
594 only condition, using the responsive vertices for all three conditions. The bars show the mean values across all  
595 subjects, and the points are individual data for each subject (median pRF sizes). Any data points with a value of  
596 zero (obtained if the vertices for the condition do not overlap with any bar activation) were removed before  
597 plotting, leading to unequal numbers of data points in each condition.



598 As in Experiment 1, the results of Experiment 2 also do not seem to depend on eye movements, as  
599 the median absolute deviations of eye position were on average highly consistent and relatively low  
600 for both horizontal and vertical eye movements, with averages of less than 0.5 degrees of visual  
601 angle for both conditions (see Figure 11). General linear mixed models followed by posthoc pairwise  
602 comparisons suggested that there were no significant differences in eye position between the bar-  
603 only and size-defined conditions, either for the X or the Y direction (for X, bar-transparent:  $t_{35,20} = -$   
604  $0.055$ ,  $p = 0.998$ , bar-size:  $t_{35,04} = -1.439$ ,  $p = 0.332$ , transparent-size:  $t_{35,20} = -1.354$ ,  $p = 0.375$ . For Y,  
605 bar-transparent:  $t_{35,23} = 0.667$ ,  $p = 0.784$ , bar-size:  $t_{35,05} = -1.513$ ,  $p = 0.297$ , transparent-size:  $t_{35,23} = -$   
606  $2.149$ ,  $p = 0.094$ ). As before, this suggests that participants were highly compliant with the fixation  
607 instructions and that differences in fixation stability cannot account for our results.

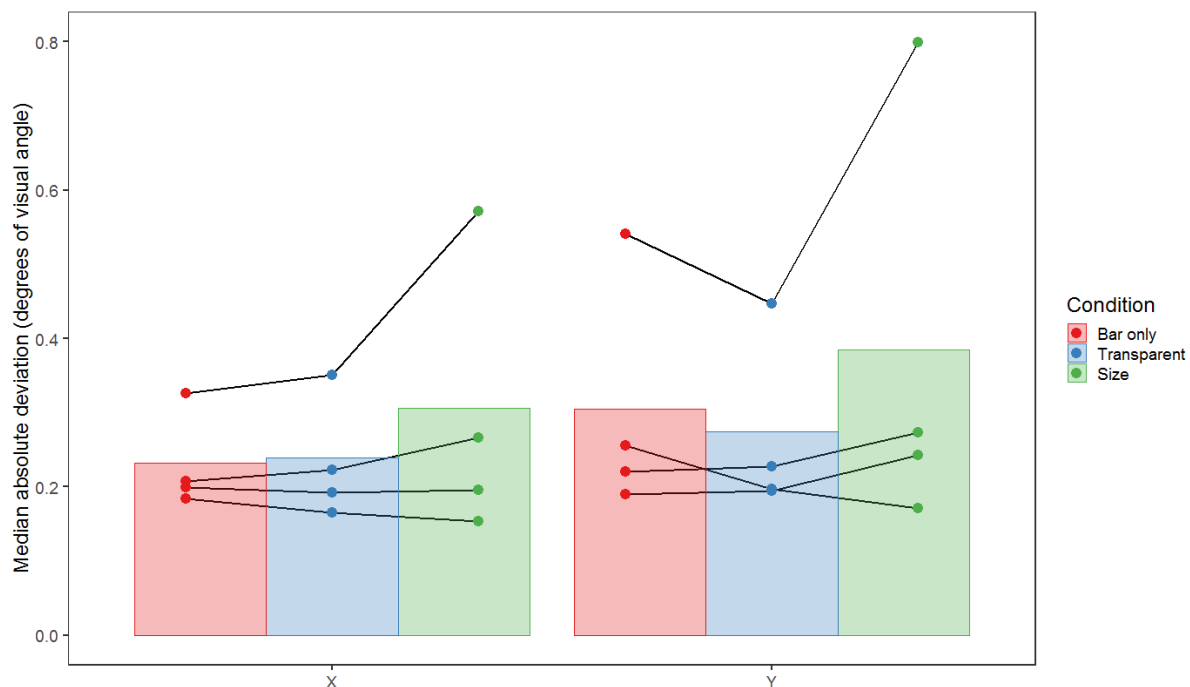

608  
609 **Figure 11.** Plot showing the mean of the median absolute deviation of eye position across runs, conditions and  
610 observers ( $n = 4$ ) for both the X (horizontal) and Y (vertical) dimensions of Experiment 2, in degrees of visual  
611 angle. Error bars are +/- 1SD of the mean. Lines connect data points from individual subjects.

#### 612 4. Experiment 3

613 In Experiment 2, we found very similar responses across visual areas for the transparent and size-  
614 defined stimuli, both of which differed from the bar-only stimulus. This indicates that the visibility or  
615 salience of the bar element could be important in determining responsivity and associated pRF  
616 properties. However, there are several possible aspects of visibility that could be involved. One is  
617 perceptual visibility, whereby the bar element may be less detectable (or more difficult to attend to)  
618 in some stimuli than others, particularly in peripheral vision. Another is neural 'visibility', where pRF

619 analyses might be affected by the reduced signal-to-noise ratio in cases where there is a background  
620 signal (e.g. from the noise dots in the 'global' stimulus) as well as the responses to the bar element.  
621 To distinguish between these possibilities, we therefore carried out a control perceptual experiment,  
622 quantitatively assessing the visibility of the stimulus types used in Experiments 1 and 2 at different  
623 eccentricities, using psychophysical techniques. If perceptual visibility can explain the results found,  
624 we would predict that the ability of participants to detect the stimuli should follow the same pattern  
625 as the differences in responsiveness seen in Experiments 1 and 2. Specifically, bar stimuli should be  
626 highly visible, with a slight reduction in visibility for the kinetic stimuli, and further reductions for the  
627 global, transparent, and size-defined stimuli.

## 628 **4.1. Materials and Methods**

### 629 *4.1.1. Participants*

630 Eight participants (three male) took part in the perceptual experiment, including two authors (who  
631 participated in both fMRI experiments), one non-author participant who took part in Experiment 1,  
632 and five naive participants (age range 21 – 37 years, mean age: 25.9 years). All had normal or  
633 corrected-to-normal visual acuity and provided written consent, as in previous experiments.

### 634 *4.1.2. Stimuli and procedures*

635 The experiment was carried out in a laboratory setting (i.e. not in the scanner), with stimuli  
636 presented on a Display++ monitor (Cambridge Research Systems, UK) with a size of 71 x 39.5 cm, a  
637 resolution of 2560 x 1440 pixels, and a refresh rate of 120Hz. Viewing distance was 1m, with head  
638 movements restricted through the use of a chin and forehead rest. Responses were made via  
639 keypad. Stimulus parameters were set to subtend the same visual angle as in the fMRI set up.

640 On each trial, participants were presented with a single bar location of the stimuli used for the main  
641 fMRI experiments, meaning that the bar was presented in one of 22 different locations on the screen  
642 for 1 second (the middle three locations were excluded from this experiment to avoid ambiguity  
643 regarding their location relative to fixation). The participant's task was to determine whether the bar  
644 was above, below, left or right of the fixation point, and press the corresponding button on a keypad  
645 to indicate their choice.

646 Each participant judged the bar location in five different types of stimuli: the three conditions used  
647 in Experiment 1 (bar only, kinetic and global) and the transparent and size-defined conditions from  
648 Experiment 2. All parameters used for these conditions were unchanged from the fMRI experiments.  
649 One block of the experiment used just one of the five stimulus types, with five repeats of all the  
650 possible positions (22) presented in two orientations (horizontal and vertical), giving 220 trials per

651 block. The order of trials within a block was randomized. Each participant completed 10 blocks in  
652 total (two blocks of each stimulus type) and the order of these blocks was pseudorandomized (each  
653 stimulus type appeared once in the first five trials and once in the second five trials).

654 Testing was completed in two sessions of approximately 40-50 minutes each. At the beginning of the  
655 first session, naïve subjects were given practice trials for all stimuli. This involved showing the stimuli  
656 initially for 5s, and then running a practice block for each stimulus type where the bars were  
657 presented only at the innermost bar locations. This was done to ensure that naïve participants had a  
658 similar amount of experience with the stimuli as those who had participated in the fMRI  
659 experiments.

## 660 4.2. Results and Discussion

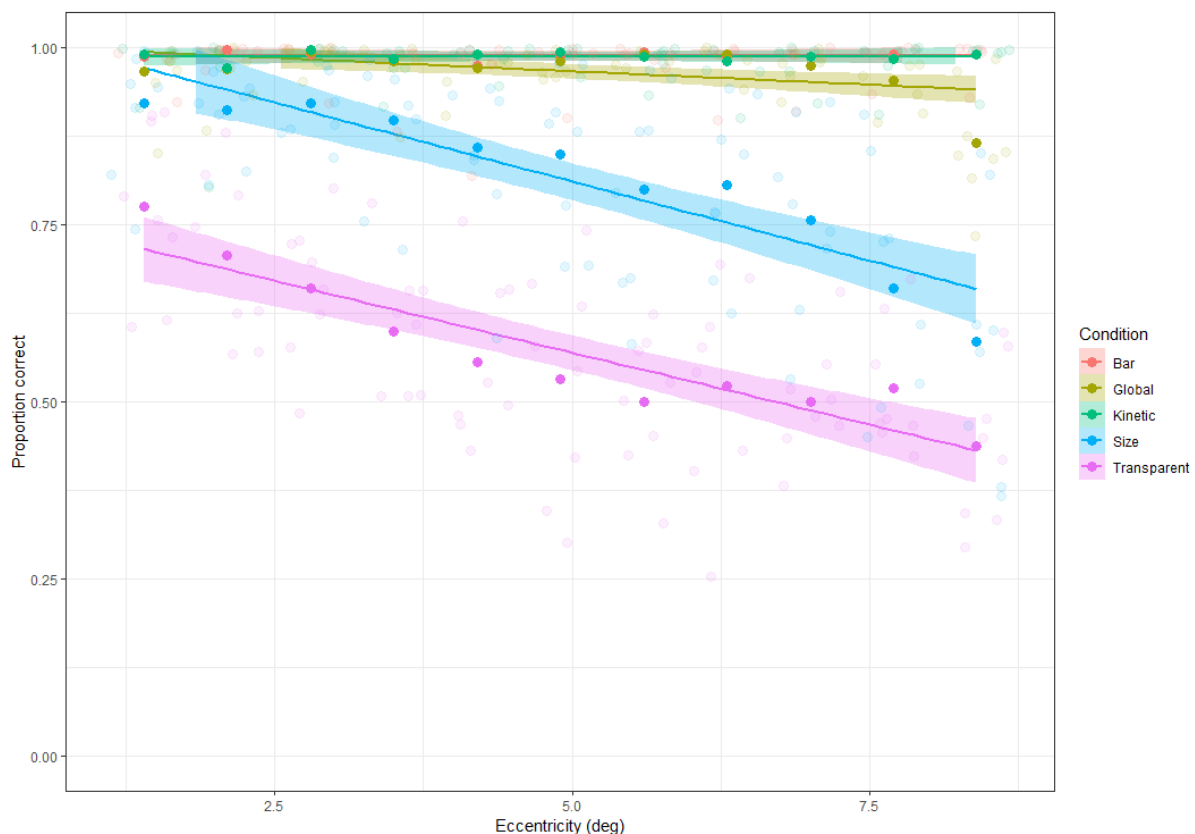

661  
662 **Figure 12.** Plot showing the mean percent correct (n=8 participants) for each of the five stimulus types in the  
663 perceptual experiment, across different eccentricities. All individual data points are represented, along with a linear  
664 fit to the full data set for each condition.

665 For each condition, responses were collated by eccentricity (collapsed across both visual hemifield  
666 and bar orientation) and scored as the proportion correct at each point. Figure 12 shows these  
667 responses along with the best-fitting linear function for each condition, a comparison that shows  
668 clear differences in visibility for the different stimulus conditions used in our experiments. Both the  
669 bar and kinetic stimuli were highly visible at even the furthest eccentricities. In contrast, the global

670 stimulus was highly visible at central eccentricities, with a slight drop in visibility at 10-12 deg,  
671 although the difference in the slope of the linear fit was not significantly different from the bar  
672 condition ( $t = -1.473$ ,  $p = 0.142$ ). The size-defined stimulus was slightly harder to localise, even in  
673 central vision, with a steeper decline in visibility with eccentricity that was significantly different  
674 from that of the bar stimulus ( $t = -8.632$ ,  $p < 0.001$ ). The transparent-motion stimulus was even less  
675 visible at central eccentricities (though performance was still well above chance), with a similarly  
676 steep decline in visibility with increasing eccentricity that was again significantly different from the  
677 bar stimulus ( $t = -7.857$ ,  $p < 0.001$ ). Detectability of the size-defined and transparent-motion stimuli  
678 was more variable across participants (as indicated by the larger error bars), similar to the variation  
679 in visibility reported in Experiment 2.

680 Overall however, the above pattern of visibility does not closely match the variations observed in the  
681 properties of the pRFs measured with these stimuli. In particular, the global condition was similarly  
682 visible to the kinetic and bar conditions but showed a very different pattern of pRF data in  
683 Experiment 1. Conversely, the size-defined and transparent conditions showed clear reductions in  
684 visibility relative to both the global condition and to each other, and yet the pRF properties  
685 measured with these stimuli were both similar to those of the global condition. We conclude that  
686 stimulus visibility is unlikely to account for these differences in pRF properties.

## 687 **5. Discussion**

688 In this study, we show that retinotopic mapping stimuli defined by motion produce clear and highly  
689 consistent differences in the properties of population receptive fields (pRFs) measured across the  
690 visual hierarchy, including responsivity, goodness of fit, and pRF size. As predicted, we show that a  
691 bar mapping stimulus defined by moving dots (against a blank background) produces strong pRF  
692 maps in early visual areas, with responsivity decreasing and pRF sizes increasing in areas higher in  
693 the motion processing hierarchy. More complex motion stimuli, such as bars defined by kinetic and  
694 global motion (against backgrounds of opposing motion or noise, respectively), produce a much  
695 lower degree of responsivity in early visual areas, with a reduction in pRF sizes for higher visual  
696 areas, and reductions in goodness of fit across the hierarchy as a whole. Control analyses further  
697 suggest that the reduction in pRF size can be attributed to the reduction in the voxels included for  
698 each stimulus, rather than changes in pRF size within voxels. Although it is tempting to attribute this  
699 to differences in the potential for these visual areas to distinguish these higher-order stimuli, a  
700 second experiment showed highly similar patterns of responsivity, goodness of fit, and pRF size  
701 across visual areas for a stimulus defined by transparent motion (against a non-transparent  
702 background) and a size-defined stimulus (with no differences in motion) that were reduced in

703 visibility. This suggests that the observed differences in pRF properties are not specific to mapping  
704 stimuli defined by differences in stimulus motion.

705 As outlined in the introduction, evidence from a variety of experimental approaches suggests that  
706 motion is processed hierarchically in the visual system, with local motion processed in early visual  
707 areas, such as V1, and global motion processed in higher areas, such as MT+ (**Adelson and Movshon,**  
708 **1982; Braddick et al., 2001; Movshon, 1986; Van Essen and Gallant, 1994; Williams and Sekuler,**  
709 **1984**). These differences in selectivity predict differences in pRF size and responsivity between local  
710 motion defined stimuli (such as our bar stimulus) and global motion defined stimuli (such as our  
711 global stimulus) for these different areas. Our results indeed show these differences, sometimes  
712 quite strikingly; the lack of response in V1 for the global stimulus is highly consistent across  
713 observers. Support for differences derived from other forms of motion selectivity is less clear. In  
714 particular, it has been suggested that kinetic boundary stimuli are processed preferentially in visual  
715 area V3B (**Van Oostende et al., 1997**). However, our results show that responses were equally as  
716 strong in V3A, with comparable pRF sizes and goodness-of-fit values that were, if anything, better  
717 than V3B. Our results therefore suggest that although there were clear differences in the pRF  
718 properties measured in early visual areas with these stimuli, amongst higher areas these kinetic  
719 boundary stimuli produced widespread changes in pRF properties that are difficult to localize to any  
720 one area, supporting the notion that motion boundaries may be processed in a wide number of  
721 areas in the visual cortex (**Larsson et al., 2010; Larsson and Heeger, 2006**).

722 The fact that we see very similar response patterns for both our 'transparent' and 'size-defined'  
723 conditions in Experiment 2 further suggests that we should be cautious about attributing our results  
724 to differential motion processing in distinct visual areas and should instead consider alternative  
725 explanations. One possibility is that the results could reflect a decrease in visibility because of the  
726 presentation of these bar mapping stimuli in peripheral vision. Our sensitivity to global motion  
727 (**Raymond, 1994**), transparent motion (**De Bruyn, 1997**), and kinetic boundaries or motion-defined  
728 form (**Regan and Beverley, 1984**) are all known to decline in the periphery. These declines can be  
729 corrected for by adjusting the contrast, size, and speed of stimuli (**Hess and Aaen-Stockdale, 2008;**  
730 **Regan and Hamstra, 1991**), at least to some extent. However, were the lack of eccentricity scaling a  
731 problem with our stimuli, we should have seen an increase in average pRF size with our motion-  
732 defined stimuli due to the loss of responsivity from neurons with small receptive fields (as seen in  
733 comparisons between size-invariant and eccentricity-scaled bar stimuli; (**Alvarez et al., 2015**)). Our  
734 psychophysical results in Experiment 3 also show that while there are decreases in visibility in  
735 peripheral vision, these do not show a consistent relationship with our pRF data. For instance, while

736 the global, transparent and size-defined conditions all showed reductions in pRF responsivity relative  
737 to the bar-only stimulus, the bar element in the global condition was in fact clearly visible at all but  
738 the most extreme eccentricities. Conversely, the size-defined bars were much harder to localise,  
739 with further reductions for the transparent stimulus, and yet pRF responsivity rates for these two  
740 conditions were similar. This suggests that perceptual visibility is not the main factor driving the  
741 responses we observe.

742 Previous research has shown that differences in attention to peripheral stimuli can also influence  
743 neural responses. One study found decreased responses in V1 (but stronger responses in parietal  
744 and frontal areas) when participants distinguished between stimulus and background entirely  
745 attentionally (**Saygin and Sereno, 2008**). It has also recently been shown that it is possible to map  
746 retinotopic responses for bar stimuli defined by illusory contours, occluded parts of a bar, or very  
747 low luminance contrast (**Haas and Schwarzkopf, 2018**), suggesting that the mapping reflected  
748 spatial attention rather than specific visual properties of these stimuli. In the current experiment, it  
749 is likely that the more complex second-order stimuli used were more attentionally demanding than  
750 the 'bar-only' stimuli. Along these lines, second-order motion has been found to be more difficult to  
751 process at multiple locations compared to first-order motion, suggesting that second-order motion is  
752 more attentionally demanding (**Lu et al., 2000**). Direction discrimination thresholds for second-order  
753 motion are also influenced more strongly by attention than thresholds for first-order motion (**Allen  
754 and Ledgeway, 2003**). It may be then that the greater attentional demands required to detect  
755 second-order stimuli (like our bars defined by differences in global motion) are more important for  
756 determining the responsivity and properties than the stimulus parameters. Again, however, the  
757 results of our psychophysical experiment argue against this – the global stimulus in particular was  
758 highly visible across the visual field (suggesting that observers had no difficulty attending to these  
759 bar elements) and yet pRF responses were similar to those for the transparent stimulus that was  
760 much less visible (and which therefore may have presented difficulties for attention). In other words,  
761 attention does not seem to offer a complete explanation for our results.

762 Another possibility is that our motion- and size-defined stimuli may have produced an illusory sense  
763 of depth for the bar stimulus, which may then have altered our measured pRF properties. It is known  
764 that areas such as V3B and V3A are involved in the processing of depth cues (**Tyler et al., 2006**), and  
765 particularly with integration of depth cues with other signals, such as motion (**Ban et al., 2012**).  
766 However, we think this is unlikely to be a complete explanation of our results, as participants did not  
767 report strong depth percepts for any of our stimuli. In addition, it is not clear that this hypothesis  
768 would explain the patterns observed in our results; we did not see markedly stronger responses in

769 V3A/V3B, as has been observed in previous fMRI studies of depth perception (**Anzai and DeAngelis,**  
770 **2010; Backus et al., 2001; Tsao et al., 2003**). A related suggestion is that the responses in higher  
771 visual areas may be a consequence of surface segmentation cues; however, again, research has  
772 shown that early visual areas such as V1 are also activated by texture detection and surface  
773 segregation processes (**Scholte et al., 2008**).

774 Finally, rather than psychophysical visibility, it is likely that the visibility of the neural responses to  
775 mapping stimuli (relative to background activity and noise levels) may be an issue in the  
776 measurement of population receptive fields. pRF analyses rely on a difference in BOLD response  
777 when the stimulus bar and the background are presented in a given location of the visual field  
778 (though of course the BOLD response is an indirect measure of differences in neural processing that  
779 may reflect vascular responses in some situations; (**Logothetis, 2008; O'Herron et al., 2016**)).  
780 Changes in the response to the background stimulus may therefore affect our ability to derive these  
781 measures. In particular, although unidirectional global motion typically drives BOLD responses in MT  
782 to a greater extent than incoherent noise (**Braddick et al., 2001**), incoherent noise stimuli still  
783 produce an increased response within MT relative to stationary stimuli (**McKeefry et al., 1997**). The  
784 same would be true for our kinetic boundary and transparent stimuli. It is possible therefore that the  
785 luminance-defined differences produced by the bar-only stimulus produce a clearer difference  
786 between bar and background responses than the motion-defined differences of the other  
787 conditions, consistent with the observed reductions in goodness of fit for the pRF parameters  
788 derived using these motion-based stimuli. This could also explain why size-defined stimuli produced  
789 a similar pattern of results, given that the noise dots used in these stimuli would similarly decrease  
790 the difference in BOLD response to the stimulus bar relative to the background. Larger pRF estimates  
791 are likely to be particularly vulnerable to this issue, given that these voxels tend to show the worst  
792 goodness-of-fit. For instance, in Experiment 1 there was a clear negative correlation between  $R^2$  and  
793 pRF size in V1, even with the bar-only stimuli ( $\rho = -0.721$ ,  $p < 0.001$ ). Voxels with large pRF estimates  
794 may thus be the first to drop out with our motion-based stimuli, leading to our observed reductions  
795 in pRF size. Were this to be the case, our findings would in fact reflect the selectivity of visual brain  
796 regions for motion (given the increased responsivity to the stimulus background), though the  
797 reduction in pRFs could not be strictly interpreted as a property of the underlying neural  
798 populations. Given that our behavioural data suggests that simple psychophysical visibility is not well  
799 matched to our pRF results, we would argue that this explanation provides the most parsimonious  
800 explanation of our results.

801 Previous work has suggested that when the stimulus bar is defined by orientation contrast,  
802 reductions in pRF size in higher visual areas (such as LO1 and LO2) may be caused by the stimulus  
803 mainly driving neurons sensitive to orientation contrast (**Yildirim et al., 2018**). Here, while we also  
804 find reductions in pRF size for our more complex second-order conditions, the similarity in responses  
805 between very different conditions (like the size-defined and transparent stimuli) leads us to argue  
806 that this reduction can be more parsimoniously explained by reductions in the signal-to-noise ratio  
807 of the neural signal, as discussed above. Of course, this does not mean that second-order stimuli are  
808 not useful (for example, they may potentially improve the accuracy of pRF estimates by reducing  
809 BOLD displacement; (**Olman et al., 2007; Yildirim et al., 2018**), and it does not mean that there may  
810 not be stimulus-specific signals in pRF mapping; for example, recent studies have shown that varying  
811 the orientation or direction of motion of the carrier stimulus within the bar apertures used for  
812 mapping can lead to differences in pRF parameters (**Dumoulin et al., 2014; Harvey and Dumoulin,**  
813 **2016**). We simply urge future researchers to be cautious when interpreting the functional meaning  
814 of changes in pRF properties.

815 In conclusion, we find evidence for variations in the properties of retinotopic maps for different  
816 motion-based stimuli. In particular, we find clear retinotopic maps for stimuli defined by a moving  
817 bar of dots against a blank background, but much weaker maps when the bar was defined by  
818 coherently moving dots against a background of either incoherent or oppositely-moving dots, or by  
819 transparent compared to non-transparent motion. However, the similar maps derived from stimuli  
820 defined by size differences suggest that these differences do not reflect a change in the responsivity  
821 of neurons in different visual areas to different motion properties. We similarly rule out variations in  
822 perceptual visibility or attentional selection of the bars with our behavioural data. Rather, we  
823 suggest that it is the visibility of the neural signal for retinotopic mapping stimuli, as defined by the  
824 signal-to-noise ratio between bar and background responses, that is the most important driver of  
825 pRF properties.

826 **Supplementary Materials:** Video S1: Example bar-only stimulus, Video S2: Example kinetic stimulus, Video S3: Example  
827 global stimulus, Video S4: Example transparent bar-only stimulus, Video S5: Example transparent motion stimulus, Video  
828 S6: Example size-defined stimulus. Supplementary document: containing an example delineation of TO1 and TO2,  
829 eccentricity plots and analyses using a  $R^2$  threshold of 0.1.

830 **Acknowledgments:** Supported by ERC Starting Grant WMOSPOTWU to DSS, and Career Development Award  
831 MR/K024817/1 from the UK Medical Research Council to JAG. Our thanks to Jingxiu Cheng for his help with data collection  
832 in the behavioural experiment.

833 **Author Contributions:** All authors conceived and designed the experiments and performed the experiments; A.H. and  
834 D.S.S. analysed the data; D.S.S. contributed analysis tools; A.H. wrote the paper; all authors edited the paper and approved  
835 the final version.

836 **Conflicts of Interest:** The authors declare no conflict of interest. The funding sponsors had no role in the design of the  
837 study; in the collection, analyses, or interpretation of data; in the writing of the manuscript, and in the decision to publish  
838 the results.





840 **References**

841

- 842 Adelson, E.H., Movshon, J.A., 1982. Phenomenal coherence of moving visual patterns. *Nature* 300,  
843 523–525.
- 844 Allen, H.A., Ledgeway, T., 2003. Attentional modulation of threshold sensitivity to first-order motion  
845 and second-order motion patterns. *Vision Res.* 43, 2927–2936.  
846 <https://doi.org/10.1016/j.visres.2003.07.005>
- 847 Alvarez, I., Haas, D., A, B., Clark, C.A., Rees, G., Schwarzkopf, D.S., 2015. Comparing different stimulus  
848 configurations for population receptive field mapping in human fMRI. *Front. Hum. Neurosci.*  
849 9. <https://doi.org/10.3389/fnhum.2015.00096>
- 850 Amano, K., Wandell, B.A., Dumoulin, S.O., 2009. Visual field maps, population receptive field sizes,  
851 and visual field coverage in the human MT+ complex. *J. Neurophysiol.* 102, 2704–2718.  
852 <https://doi.org/10.1152/jn.00102.2009>
- 853 Anzai, A., DeAngelis, G.C., 2010. Neural computations underlying depth perception. *Curr. Opin.*  
854 *Neurobiol.* 20, 367–375. <https://doi.org/10.1016/j.conb.2010.04.006>
- 855 Backus, B.T., Fleet, D.J., Parker, A.J., Heeger, D.J., 2001. Human cortical activity correlates with  
856 stereoscopic depth perception. *J. Neurophysiol.* 86, 2054–2068.  
857 <https://doi.org/10.1152/jn.2001.86.4.2054>
- 858 Ban, H., Preston, T.J., Meeson, A., Welchman, A.E., 2012. The integration of motion and disparity  
859 cues to depth in dorsal visual cortex. *Nat. Neurosci.* 15, 636–643.  
860 <https://doi.org/10.1038/nn.3046>
- 861 Bates, D., Mächler, M., Bolker, B., Walker, S., 2014. Fitting Linear Mixed-Effects Models using lme4.  
862 *ArXiv14065823 Stat.*
- 863 Braddick, O.J., O'Brien, J.M., Wattam-Bell, J., Atkinson, J., Hartley, T., Turner, R., 2001. Brain areas  
864 sensitive to coherent visual motion. *Perception* 30, 61–72. <https://doi.org/10.1068/p3048>
- 865 Brainard, D.H., 1997. The Psychophysics Toolbox. *Spat. Vis.* 10, 433–436.
- 866 Breuer, F.A., Blaimer, M., Heidemann, R.M., Mueller, M.F., Griswold, M.A., Jakob, P.M., 2005.  
867 Controlled aliasing in parallel imaging results in higher acceleration (CAIPRINHA) for multi-  
868 slice imaging. *Magn. Reson. Med.* 53, 684–691. <https://doi.org/10.1002/mrm.20401>
- 869 Britten, K.H., Shadlen, M.N., Newsome, W.T., Movshon, J.A., 1993. Responses of neurons in  
870 macaque MT to stochastic motion signals. *Vis. Neurosci.* 10, 1157–1169.
- 871 Britten, K.H., Shadlen, M.N., Newsome, W.T., Movshon, J.A., 1992. The analysis of visual motion: a  
872 comparison of neuronal and psychophysical performance. *J. Neurosci. Off. J. Soc. Neurosci.*  
873 12, 4745–4765.
- 874 Chen, S.C., Morley, J.W., Solomon, S.G., 2015. Spatial precision of population activity in primate area  
875 MT. *J. Neurophysiol.* [jn.00152.2015. https://doi.org/10.1152/jn.00152.2015](https://doi.org/10.1152/jn.00152.2015)
- 876 Dale, A.M., Fischl, B., Sereno, M.I., 1999. Cortical surface-based analysis. I. Segmentation and surface  
877 reconstruction. *NeuroImage* 9, 179–194. <https://doi.org/10.1006/nimg.1998.0395>
- 878 De Bruyn, B., 1997. Blending Transparent Motion Patterns in Peripheral Vision. *Vision Res.* 37, 645–  
879 648. [https://doi.org/10.1016/S0042-6989\(96\)00117-4](https://doi.org/10.1016/S0042-6989(96)00117-4)
- 880 Dumoulin, S.O., Hess, R.F., May, K.A., Harvey, B.M., Rokers, B., Barendregt, M., 2014. Contour  
881 extracting networks in early extrastriate cortex. *J. Vis.* 14, 18–18.  
882 <https://doi.org/10.1167/14.5.18>
- 883 Dumoulin, S.O., Wandell, B.A., 2008. Population receptive field estimates in human visual cortex.  
884 *NeuroImage* 39, 647–660. <https://doi.org/10.1016/j.neuroimage.2007.09.034>
- 885 Dupont, P., Orban, G.A., De Bruyn, B., Verbruggen, A., Mortelmans, L., 1994. Many areas in the  
886 human brain respond to visual motion. *J. Neurophysiol.* 72, 1420–1424.  
887 <https://doi.org/10.1152/jn.1994.72.3.1420>
- 888 Edwards, M., Cassanello, C.R., Kalia, K., 2012. Adaptation state of the local-motion-pooling units  
889 determines the nature of the motion aftereffect to transparent motion. *Vision Res.* 64, 23–  
890 25. <https://doi.org/10.1016/j.visres.2012.05.006>

- 891 Edwards, M., Greenwood, J.A., 2005. The perception of motion transparency: a signal-to-noise limit.  
892 Vision Res. 45, 1877–1884. <https://doi.org/10.1016/j.visres.2005.01.026>
- 893 Edwards, M., Nishida, S., 1999. Global-motion detection with transparent-motion signals. Vision Res.  
894 39, 2239–2249.
- 895 Felleman, D.J., Van Essen, D.C., 1991. Distributed hierarchical processing in the primate cerebral  
896 cortex. Cereb. Cortex N. Y. N 1991 1, 1–47.
- 897 Fischl, B., Sereno, M.I., Dale, A.M., 1999. Cortical surface-based analysis. II: Inflation, flattening, and  
898 a surface-based coordinate system. NeuroImage 9, 195–207.  
899 <https://doi.org/10.1006/nimg.1998.0396>
- 900 Haas, B. de, Schwarzkopf, D.S., 2018. Spatially selective responses to Kanizsa and occlusion stimuli in  
901 human visual cortex. Sci. Rep. 8, 611. <https://doi.org/10.1038/s41598-017-19121-z>
- 902 Haas, B. de, Schwarzkopf, D.S., Anderson, E.J., Rees, G., 2014. Perceptual load affects spatial tuning  
903 of neuronal populations in human early visual cortex. Curr. Biol. 24, R66–R67.  
904 <https://doi.org/10.1016/j.cub.2013.11.061>
- 905 Harvey, B.M., Dumoulin, S.O., 2016. Visual motion transforms visual space representations similarly  
906 throughout the human visual hierarchy. NeuroImage 127, 173–185.  
907 <https://doi.org/10.1016/j.neuroimage.2015.11.070>
- 908 Harvey, B.M., Dumoulin, S.O., 2011. The Relationship between Cortical Magnification Factor and  
909 Population Receptive Field Size in Human Visual Cortex: Constancies in Cortical Architecture.  
910 J. Neurosci. 31, 13604–13612. <https://doi.org/10.1523/JNEUROSCI.2572-11.2011>
- 911 Heeger, D.J., Simoncelli, E.P., Movshon, J.A., 1996. Computational models of cortical visual  
912 processing. Proc. Natl. Acad. Sci. 93, 623–627.
- 913 Hess, R.F., Aaen-Stockdale, C., 2008. Global motion processing: The effect of spatial scale and  
914 eccentricity. J. Vis. 8, 11.1-11. <https://doi.org/10.1167/8.4.11>
- 915 Kanai, R., Paffen, C.L.E., Gerbino, W., Verstraten, F.A.J., 2004. Blindness to inconsistent local signals  
916 in motion transparency from oscillating dots. Vision Res. 44, 2207–2212.  
917 <https://doi.org/10.1016/j.visres.2004.04.010>
- 918 Kastner, S., DeSimone, K., Konen, C.S., Szczepanski, S.M., Weiner, K.S., Schneider, K.A., 2007.  
919 Topographic maps in human frontal cortex revealed in memory-guided saccade and spatial  
920 working-memory tasks. J. Neurophysiol. 97, 3494–3507.  
921 <https://doi.org/10.1152/jn.00010.2007>
- 922 Kay, K.N., Weiner, K.S., Grill-Spector, K., 2015. Attention Reduces Spatial Uncertainty in Human  
923 Ventral Temporal Cortex. Curr. Biol. 25, 595–600. <https://doi.org/10.1016/j.cub.2014.12.050>
- 924 Klein, B.P., Harvey, B.M., Dumoulin, S.O., 2014. Attraction of position preference by spatial attention  
925 throughout human visual cortex. Neuron 84, 227–237.  
926 <https://doi.org/10.1016/j.neuron.2014.08.047>
- 927 Knapen, T., Es, D. van, Barendregt, M., 2018. Mapping the Dark Side: Visual Selectivity of Default  
928 Network Deactivations. bioRxiv 292524. <https://doi.org/10.1101/292524>
- 929 Lagarias, J., Reeds, J., Wright, M., Wright, P., 1998. Convergence Properties of the Nelder--Mead  
930 Simplex Method in Low Dimensions. SIAM J. Optim. 9, 112–147.  
931 <https://doi.org/10.1137/S1052623496303470>
- 932 Larsson, J., Heeger, D.J., 2006. Two retinotopic visual areas in human lateral occipital cortex. J.  
933 Neurosci. Off. J. Soc. Neurosci. 26, 13128–13142. <https://doi.org/10.1523/JNEUROSCI.1657-06.2006>
- 934
- 935 Larsson, J., Heeger, D.J., Landy, M.S., 2010. Orientation selectivity of motion-boundary responses in  
936 human visual cortex. J. Neurophysiol. 104, 2940–2950.  
937 <https://doi.org/10.1152/jn.00400.2010>
- 938 Leventhal, A.G., Wang, Y., Schmolesky, M.T., Zhou, Y., 1998. Neural correlates of boundary  
939 perception. Vis. Neurosci. 15, 1107–1118.
- 940 Logothetis, N.K., 2008. What we can do and what we cannot do with fMRI. Nature 453, 869–878.  
941 <https://doi.org/10.1038/nature06976>

- 942 Lu, Z.L., Liu, C.Q., Doshier, B.A., 2000. Attention mechanisms for multi-location first- and second-  
943 order motion perception. *Vision Res.* 40, 173–186.
- 944 Marcar, V.L., Raiguel, S.E., Xiao, D., Orban, G.A., 2000. Processing of kinetically defined boundaries in  
945 areas V1 and V2 of the macaque monkey. *J. Neurophysiol.* 84, 2786–2798.  
946 <https://doi.org/10.1152/jn.2000.84.6.2786>
- 947 Marr, D., Ullman, S., 1981. Directional selectivity and its use in early visual processing. *Proc. R. Soc.*  
948 *Lond. Ser. B Contain. Pap. Biol. Character R. Soc. G. B.* 211, 151–180.
- 949 McKeefry, D.J., Watson, J.D., Frackowiak, R.S., Fong, K., Zeki, S., 1997. The activity in human areas  
950 V1/V2, V3, and V5 during the perception of coherent and incoherent motion. *NeuroImage* 5,  
951 1–12. <https://doi.org/10.1006/nimg.1996.0246>
- 952 Moutsiana, C., de Haas, B., Papageorgiou, A., van Dijk, J.A., Balraj, A., Greenwood, J.A., Schwarzkopf,  
953 D.S., 2016. Cortical idiosyncrasies predict the perception of object size. *Nat. Commun.* 7,  
954 12110. <https://doi.org/10.1038/ncomms12110>
- 955 Movshon, J.A., 1986. The analysis of moving patterns. *Pattern Recognit. Mech.* 117–151.
- 956 Muckli, L., Singer, W., Zanella, F.E., Goebel, R., 2002. Integration of Multiple Motion Vectors Over  
957 Space: An fMRI Study of Transparent Motion Perception. *NeuroImage* 16, 843–856.  
958 <https://doi.org/10.1006/nimg.2002.1085>
- 959 Murray, S.O., Boyaci, H., Kersten, D., 2006. The representation of perceived angular size in human  
960 primary visual cortex. *Nat. Neurosci.* 9, 429–434. <https://doi.org/10.1038/nn1641>
- 961 Nakayama, K., 1985. Biological image motion processing: A review. *Vision Res.* 25, 625–660.  
962 [https://doi.org/10.1016/0042-6989\(85\)90171-3](https://doi.org/10.1016/0042-6989(85)90171-3)
- 963 Nelder, J.A., Mead, R., 1965. A Simplex Method for Function Minimization. *Comput. J.* 7, 308–313.  
964 <https://doi.org/10.1093/comjnl/7.4.308>
- 965 Newsome, W.T., Paré, E.B., 1988. A selective impairment of motion perception following lesions of  
966 the middle temporal visual area (MT). *J. Neurosci. Off. J. Soc. Neurosci.* 8, 2201–2211.
- 967 Nishida, S., 2011. Advancement of motion psychophysics: Review 2001–2010. *J. Vis.* 11.  
968 <https://doi.org/10.1167/11.5.11>
- 969 O’Herron, P., Chhatbar, P.Y., Levy, M., Shen, Z., Schramm, A.E., Lu, Z., Kara, P., 2016. Neural  
970 correlates of single-vessel haemodynamic responses *in vivo*. *Nature* 534, 378–382.  
971 <https://doi.org/10.1038/nature17965>
- 972 Olman, C.A., Inati, S., Heeger, D.J., 2007. The effect of large veins on spatial localization with GE  
973 BOLD at 3 T: Displacement, not blurring. *NeuroImage* 34, 1126–1135.  
974 <https://doi.org/10.1016/j.neuroimage.2006.08.045>
- 975 Pelli, D.G., 1997. The VideoToolbox software for visual psychophysics: transforming numbers into  
976 movies. *Spat. Vis.* 10, 437–442.
- 977 Pitzalis, S., Sereno, M.I., Committeri, G., Fattori, P., Galati, G., Patria, F., Galletti, C., 2010. Human V6:  
978 The Medial Motion Area. *Cereb. Cortex N. Y. NY* 20, 411–424.  
979 <https://doi.org/10.1093/cercor/bhp112>
- 980 Pooresmaeili, A., Arrighi, R., Biagi, L., Morrone, M.C., 2013. Blood Oxygen Level-Dependent  
981 Activation of the Primary Visual Cortex Predicts Size Adaptation Illusion. *J. Neurosci.* 33,  
982 15999–16008. <https://doi.org/10.1523/JNEUROSCI.1770-13.2013>
- 983 Qian, N., Andersen, R.A., 1994. Transparent motion perception as detection of unbalanced motion  
984 signals. II. Physiology. *J. Neurosci. Off. J. Soc. Neurosci.* 14, 7367–7380.
- 985 Qian, N., Andersen, R.A., Adelson, E.H., 1994. Transparent motion perception as detection of  
986 unbalanced motion signals. I. Psychophysics. *J. Neurosci. Off. J. Soc. Neurosci.* 14, 7357–  
987 7366.
- 988 Raymond, J.E., 1994. Directional anisotropy of motion sensitivity across the visual field. *Vision Res.*  
989 34, 1029–1037.
- 990 Regan, D., Beverley, K.I., 1984. Figure–ground segregation by motion contrast and by luminance  
991 contrast. *JOSA A* 1, 433–442. <https://doi.org/10.1364/JOSAA.1.000433>

- 992 Regan, D., Hamstra, S., 1991. Shape discrimination for motion-defined and contrast-defined form:  
993 squareness in special. *Perception* 20, 315–336. <https://doi.org/10.1068/p200315>
- 994 Russell, L., 2018. emmeans: Estimated Marginal Means, aka Least-Squares Means. R package version  
995 1.2.1.
- 996 Saygin, A.P., Sereno, M.I., 2008. Retinotopy and attention in human occipital, temporal, parietal, and  
997 frontal cortex. *Cereb. Cortex N. Y. N* 1991 18, 2158–2168.  
998 <https://doi.org/10.1093/cercor/bhm242>
- 999 Scase, M.O., Braddick, O.J., Raymond, J.E., 1996. What is Noise for the Motion System? *Vision Res.*  
1000 36, 2579–2586. [https://doi.org/10.1016/0042-6989\(95\)00325-8](https://doi.org/10.1016/0042-6989(95)00325-8)
- 1001 Scholte, H.S., Jolij, J., Fahrenfort, J.J., Lamme, V.A.F., 2008. Feedforward and recurrent processing in  
1002 scene segmentation: electroencephalography and functional magnetic resonance imaging. *J.*  
1003 *Cogn. Neurosci.* 20, 2097–2109. <https://doi.org/10.1162/jocn.2008.20142>
- 1004 Schwarzkopf, D.S., Anderson, E.J., Haas, B. de, White, S.J., Rees, G., 2014. Larger Extrastriate  
1005 Population Receptive Fields in Autism Spectrum Disorders. *J. Neurosci.* 34, 2713–2724.  
1006 <https://doi.org/10.1523/JNEUROSCI.4416-13.2014>
- 1007 Sereno, M.I., Dale, A.M., Reppas, J.B., Kwong, K.K., Belliveau, J.W., Brady, T.J., Rosen, B.R., Tootell,  
1008 R.B., 1995. Borders of multiple visual areas in humans revealed by functional magnetic  
1009 resonance imaging. *Science* 268, 889–893.
- 1010 Simoncelli, E.P., Heeger, D.J., 1998. A model of neuronal responses in visual area MT. *Vision Res.* 38,  
1011 743–761. [https://doi.org/10.1016/S0042-6989\(97\)00183-1](https://doi.org/10.1016/S0042-6989(97)00183-1)
- 1012 Snowden, R.J., Treue, S., Erickson, R.G., Andersen, R.A., 1991. The response of area MT and V1  
1013 neurons to transparent motion. *J. Neurosci.* 11, 2768–2785.  
1014 <https://doi.org/10.1523/JNEUROSCI.11-09-02768.1991>
- 1015 Snowden, R.J., Verstraten, F.A.J., 1999. Motion transparency: making models of motion perception  
1016 transparent. *Trends Cogn. Sci.* 3, 369–377. [https://doi.org/10.1016/S1364-6613\(99\)01381-9](https://doi.org/10.1016/S1364-6613(99)01381-9)
- 1017 Sperandio, I., Chouinard, P.A., Goodale, M.A., 2012. Retinotopic activity in V1 reflects the perceived  
1018 and not the retinal size of an afterimage. *Nat. Neurosci.* 15, 540–542.  
1019 <https://doi.org/10.1038/nn.3069>
- 1020 Sunaert, S., Van Hecke, P., Marchal, G., Orban, G.A., 1999. Motion-responsive regions of the human  
1021 brain. *Exp. Brain Res.* 127, 355–370.
- 1022 Tootell, R.B.H., Hadjikhani, N., Hall, E.K., Marrett, S., Vanduffel, W., Vaughan, J.T., Dale, A.M., 1998.  
1023 The Retinotopy of Visual Spatial Attention. *Neuron* 21, 1409–1422.  
1024 [https://doi.org/10.1016/S0896-6273\(00\)80659-5](https://doi.org/10.1016/S0896-6273(00)80659-5)
- 1025 Tootell, R.B.H., Mendola, J.D., Hadjikhani, N.K., Ledden, P.J., Liu, A.K., Reppas, J.B., Sereno, M.I., Dale,  
1026 A.M., 1997. Functional Analysis of V3A and Related Areas in Human Visual Cortex. *J.*  
1027 *Neurosci.* 17, 7060–7078.
- 1028 Tsao, D.Y., Vanduffel, W., Sasaki, Y., Fize, D., Knutsen, T.A., Mandeville, J.B., Wald, L.L., Dale, A.M.,  
1029 Rosen, B.R., Essen, D.C.V., Livingstone, M.S., Orban, G.A., Tootell, R.B.H., 2003. Stereopsis  
1030 Activates V3A and Caudal Intraparietal Areas in Macaques and Humans. *Neuron* 39, 555–  
1031 568. [https://doi.org/10.1016/S0896-6273\(03\)00459-8](https://doi.org/10.1016/S0896-6273(03)00459-8)
- 1032 Tyler, C.W., Likova, L.T., Kontsevich, L.L., Wade, A.R., 2006. The specificity of cortical region KO to  
1033 depth structure. *NeuroImage* 30, 228–238.  
1034 <https://doi.org/10.1016/j.neuroimage.2005.09.067>
- 1035 van Dijk, J.A., de Haas, B., Moutsiana, C., Schwarzkopf, D.S., 2016. Intersession reliability of  
1036 population receptive field estimates. *NeuroImage* 143, 293–303.  
1037 <https://doi.org/10.1016/j.neuroimage.2016.09.013>
- 1038 Van Essen, D.C., Gallant, J.L., 1994. Neural mechanisms of form and motion processing in the  
1039 primate visual system. *Neuron* 13, 1–10.
- 1040 Van Oostende, S., Sunaert, S., Van Hecke, P., Marchal, G., Orban, G.A., 1997. The kinetic occipital  
1041 (KO) region in man: an fMRI study. *Cereb. Cortex N. Y. N* 1991 7, 690–701.

- 1042 Vidnyánszky, Z., Blaser, E., Pappathomas, T.V., 2002. Motion integration during motion aftereffects.  
1043 Trends Cogn. Sci. 6, 157–161. [https://doi.org/10.1016/S1364-6613\(02\)01871-5](https://doi.org/10.1016/S1364-6613(02)01871-5)
- 1044 Vo, V.A., Sprague, T.C., Serences, J.T., 2017. Spatial Tuning Shifts Increase the Discriminability and  
1045 Fidelity of Population Codes in Visual Cortex. J. Neurosci. Off. J. Soc. Neurosci. 37, 3386–  
1046 3401. <https://doi.org/10.1523/JNEUROSCI.3484-16.2017>
- 1047 Wallach, H., 1935. Über visuell wahrgenommene Bewegungsrichtung. Psychol. Forsch. 20, 325–380.  
1048 <https://doi.org/10.1007/BF02409790>
- 1049 Watamaniuk, S.N., 1993. Ideal observer for discrimination of the global direction of dynamic  
1050 random-dot stimuli. J. Opt. Soc. Am. A 10, 16–28.
- 1051 Williams, D.W., Sekuler, R., 1984. Coherent global motion percepts from stochastic local motions.  
1052 Vision Res. 24, 55–62. [https://doi.org/10.1016/0042-6989\(84\)90144-5](https://doi.org/10.1016/0042-6989(84)90144-5)
- 1053 Yildirim, F., Carvalho, J., Cornelissen, F.W., 2018. A second-order orientation-contrast stimulus for  
1054 population-receptive-field-based retinotopic mapping. NeuroImage, Pushing the spatio-  
1055 temporal limits of MRI and fMRI 164, 183–193.  
1056 <https://doi.org/10.1016/j.neuroimage.2017.06.073>
- 1057 Zeki, S., Perry, R.J., Bartels, A., 2003. The Processing of Kinetic Contours in the Brain. Cereb. Cortex  
1058 13, 189–202. <https://doi.org/10.1093/cercor/13.2.189>
- 1059
- 1060

1061 **Supplementary material**

1062 **Delineation of TO1 and TO2**

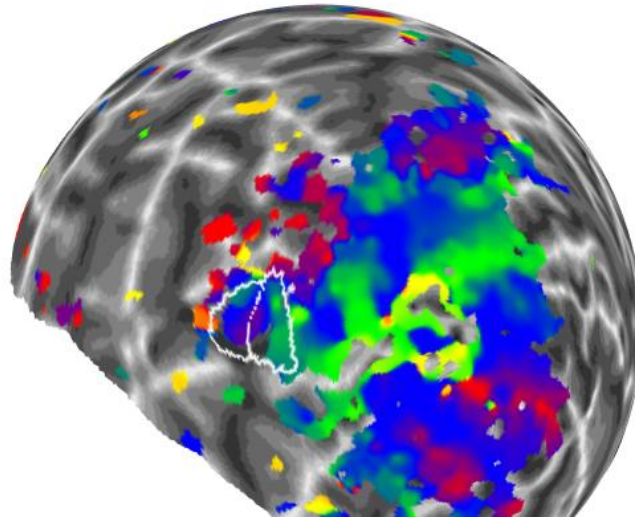

1063

1064 **Figure S1:** An example delineation of areas TO1 and TO2 on the smoothed retinotopic maps for a single participant (using  
1065 data from the dot-only bars in Experiment 1, and a threshold of 0.06). The border between them was determined as being  
1066 an upper vertical meridian reversal (red), and the outer borders on either side were either a horizontal (blue) to lower  
1067 vertical meridian (green). For analyses however, we combine TO1 and TO2 into one MT+, so the exact distinction is not  
1068 relevant for analysis.

1069

1070 **Plots of pRF size against eccentricity**

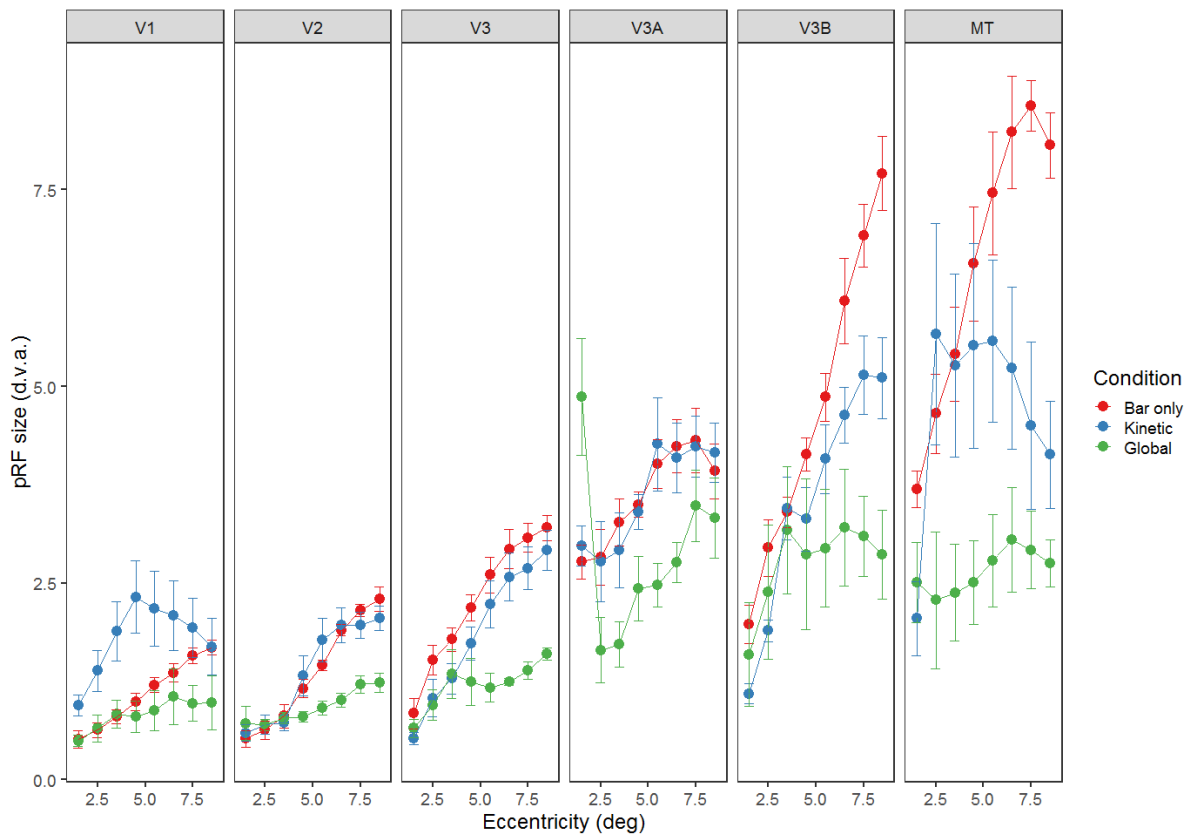

1071

1072 **Figure S2:** pRF size plotted against eccentricity for the different experimental conditions and brain regions in Experiment 1.

1073

1074



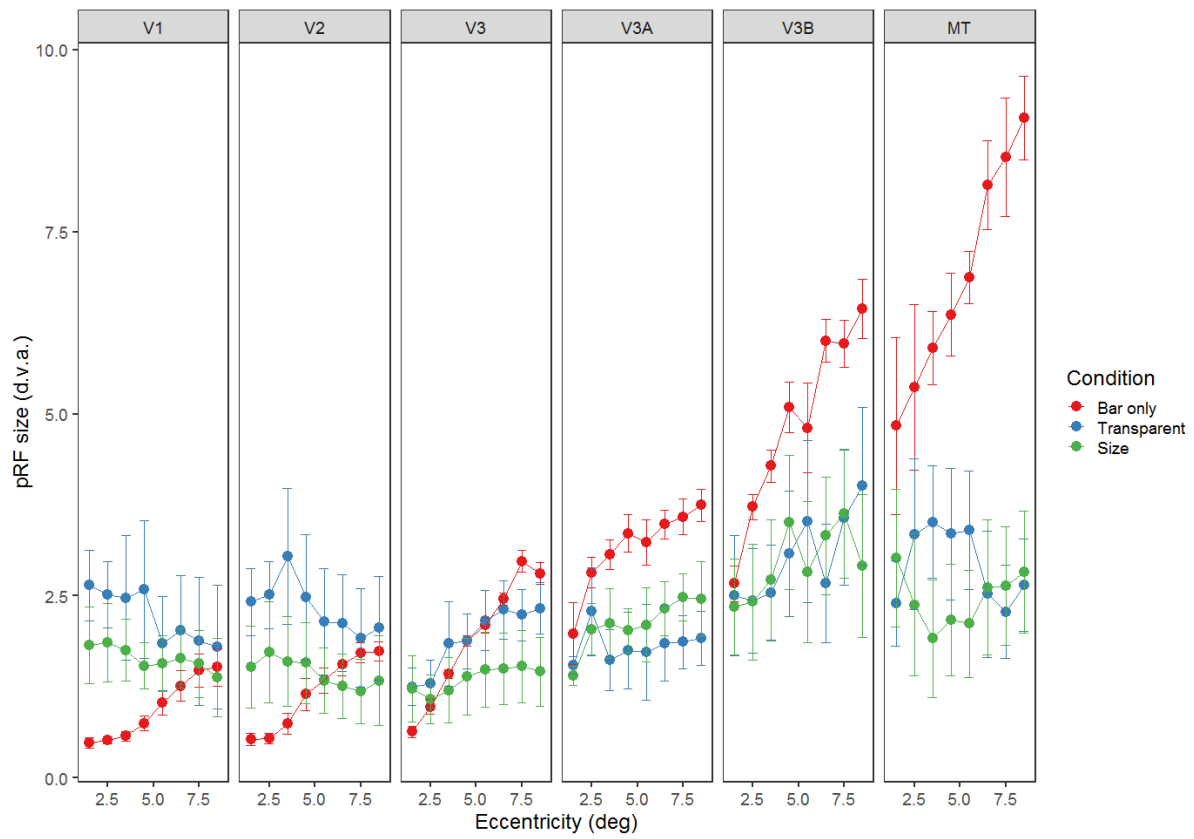

1075

1076

**Figure S3:** pRF size plotted against eccentricity for the different experimental conditions and brain regions in Experiment 2.

1077

1078 **Analyses using an  $R^2$  threshold of 0.1**

1079 As our experimental conditions often showed relatively weak and sparse responses, we used a fairly  
1080 liberal  $R^2$  threshold of 0.05 in the main analyses. Here, we show the same analyses using a more  
1081 conservative  $R^2$  threshold of 0.1. Overall, the results are highly comparable. We did not conduct  
1082 formal statistical analysis due to the relatively high levels of missing data in some conditions and for  
1083 some participants.

1084 *Experiment 1*

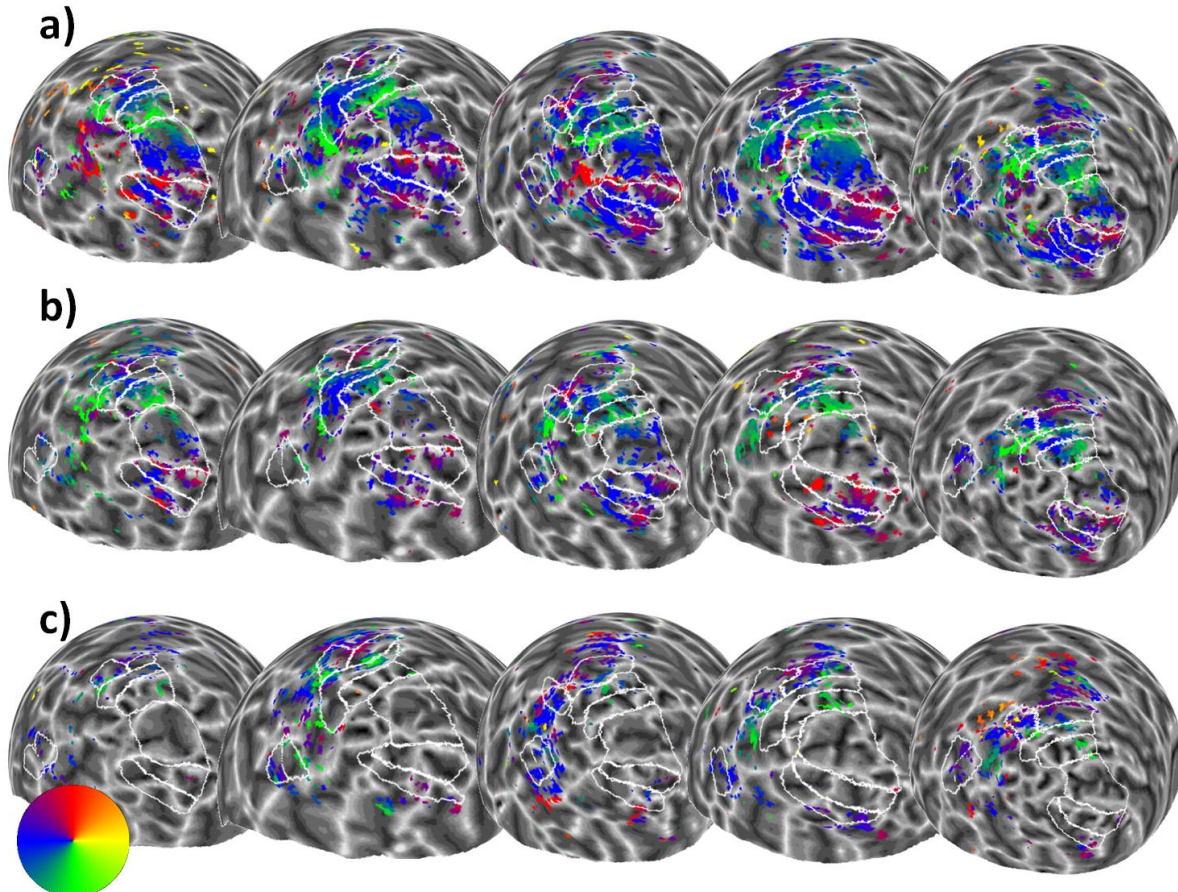

1085

1086 **Figure S4.** Sphere projection of polar angle data for the left hemispheres of all participants in Experiment 1  
1087 using an  $R^2$  threshold of 0.1. The colour of each vertex indicates the polar angle for the corresponding pRF  
1088 centre (as indicated by the colour wheel). Each person's data forms a column (subject 1 is on the far left, and  
1089 subject 5 is on the far right), and stimulus condition forms a row. Manual delineations of visual areas V1, V2,  
1090 V3, V3A, V3B and hMT+ (TO1/2) are shown. (a) Polar angle estimates for the 'bar-only' stimulus condition. (b)  
1091 Polar angle estimates for the 'kinetic' stimulus condition. (c) Polar angle estimates for the 'global' stimulus  
1092 condition.

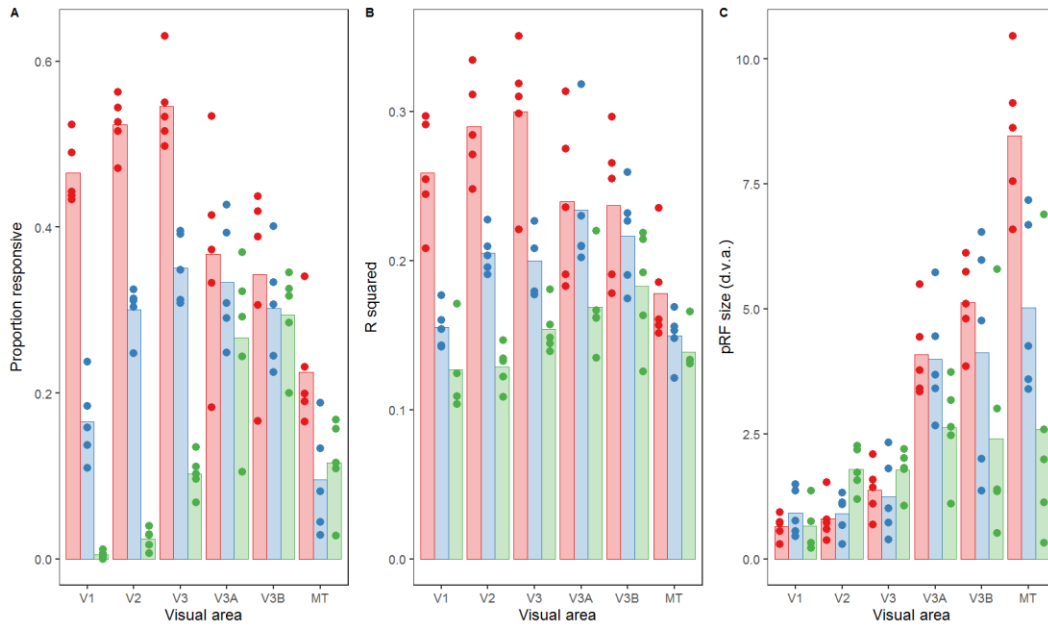

1093

1094 **Figure S5. (a)** Proportion of vertices responding, **(b)** goodness-of-fit and **(c)** pRF sizes for each condition and  
1095 visual area in Experiment 1 with an  $R^2$  threshold of 0.1. The bars show the mean values across all subjects, and  
1096 the points are individual data for each subject. Panel (a) plots the mean proportion of vertices responding for  
1097 each subject, whereas (b) and (c) plot the median goodness-of-fit values and pRF sizes respectively. Subject 2 is  
1098 missing data for the V1 global condition.

1099 *Experiment 2*

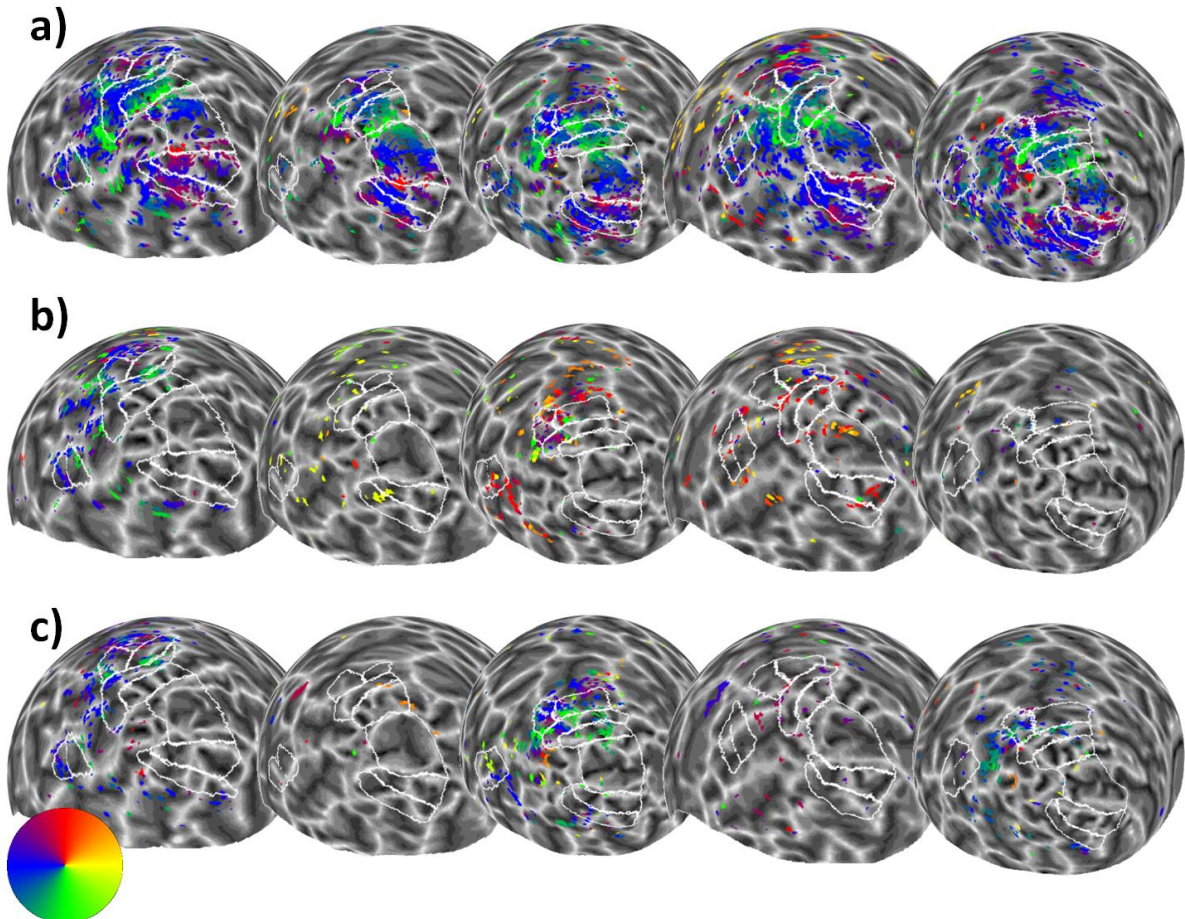

1100

1101 **Figure S6.** Sphere projection of polar angle data for the left hemispheres of all participants in Experiment 2 with  
1102 an  $R^2$  threshold of 0.1. The colour of each vertex indicates the polar angle for the corresponding pRF centre (as  
1103 as indicated by the colour wheel). Each person's data forms a column (subject 1 is on the far left and subject 5 is  
1104 on the far right), and stimulus condition forms a row. Manual delineations of visual areas V1, V2, V3, V3A, V3B,  
1105 and hMT+ (TO1/2) are shown (if the subject had taken part in Experiment 1, the delineations from this  
1106 experiment were used). (a) Polar angle estimates for the 'bar-only' stimulus condition. (b) Polar angle estimates  
1107 for the 'transparent' stimulus condition. (c) Polar angle estimates for the 'size-defined' stimulus condition.

1108

1109

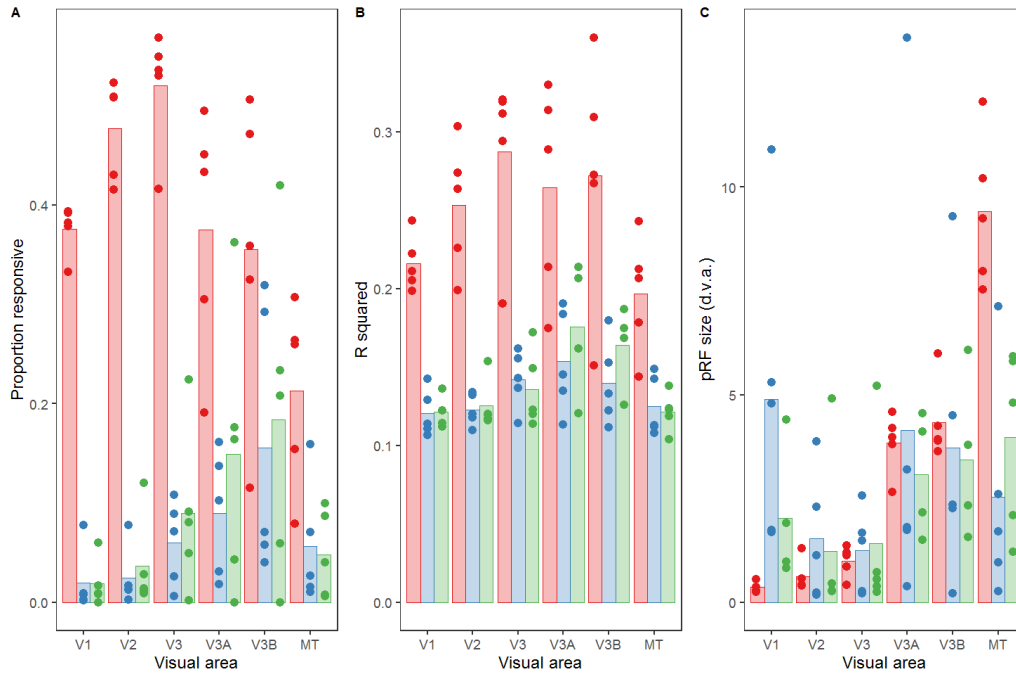

1110

1111 **Figure S7.** (a) Proportion of vertices responding, (b) goodness-of-fit and (c) pRF sizes for each condition (bar-only,  
1112 transparent, and size-defined) and visual area in Experiment 2 with an  $R^2$  threshold of 0.1. The bars show the mean values  
1113 across all subjects, and the points are individual data for each subject. In (a), this is the mean proportion of vertices  
1114 responding for each subject, whereas for (b) and (c) these are the median goodness-of-fit values and pRF sizes respectively.  
1115 Subject 2 is missing data for the size condition in V1, V3A and V3B.

1116

1117
